# Supplementary material
Source: PubMed Central journal article supplement (PMC2582558)

Fmoc-D-Arg(NO<sub>2</sub>)

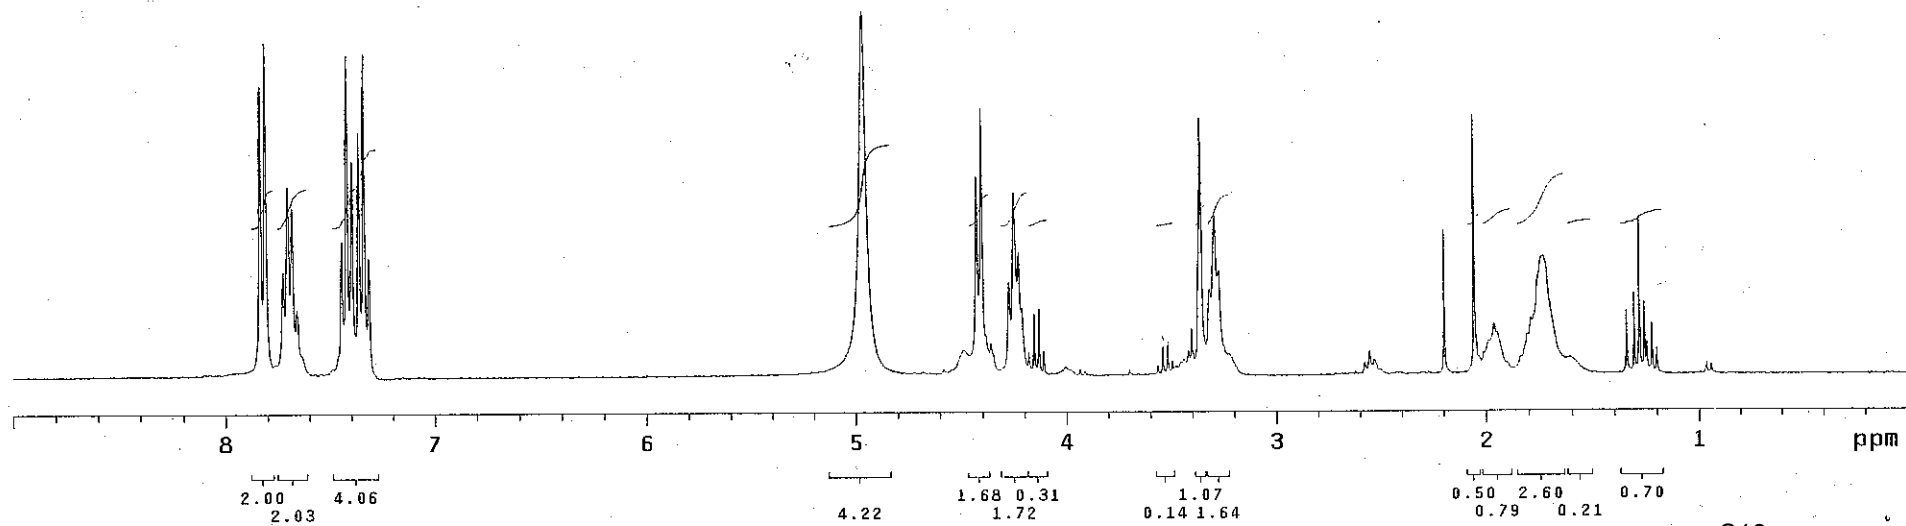

Fmoc-D-Arg(NO<sub>2</sub>)

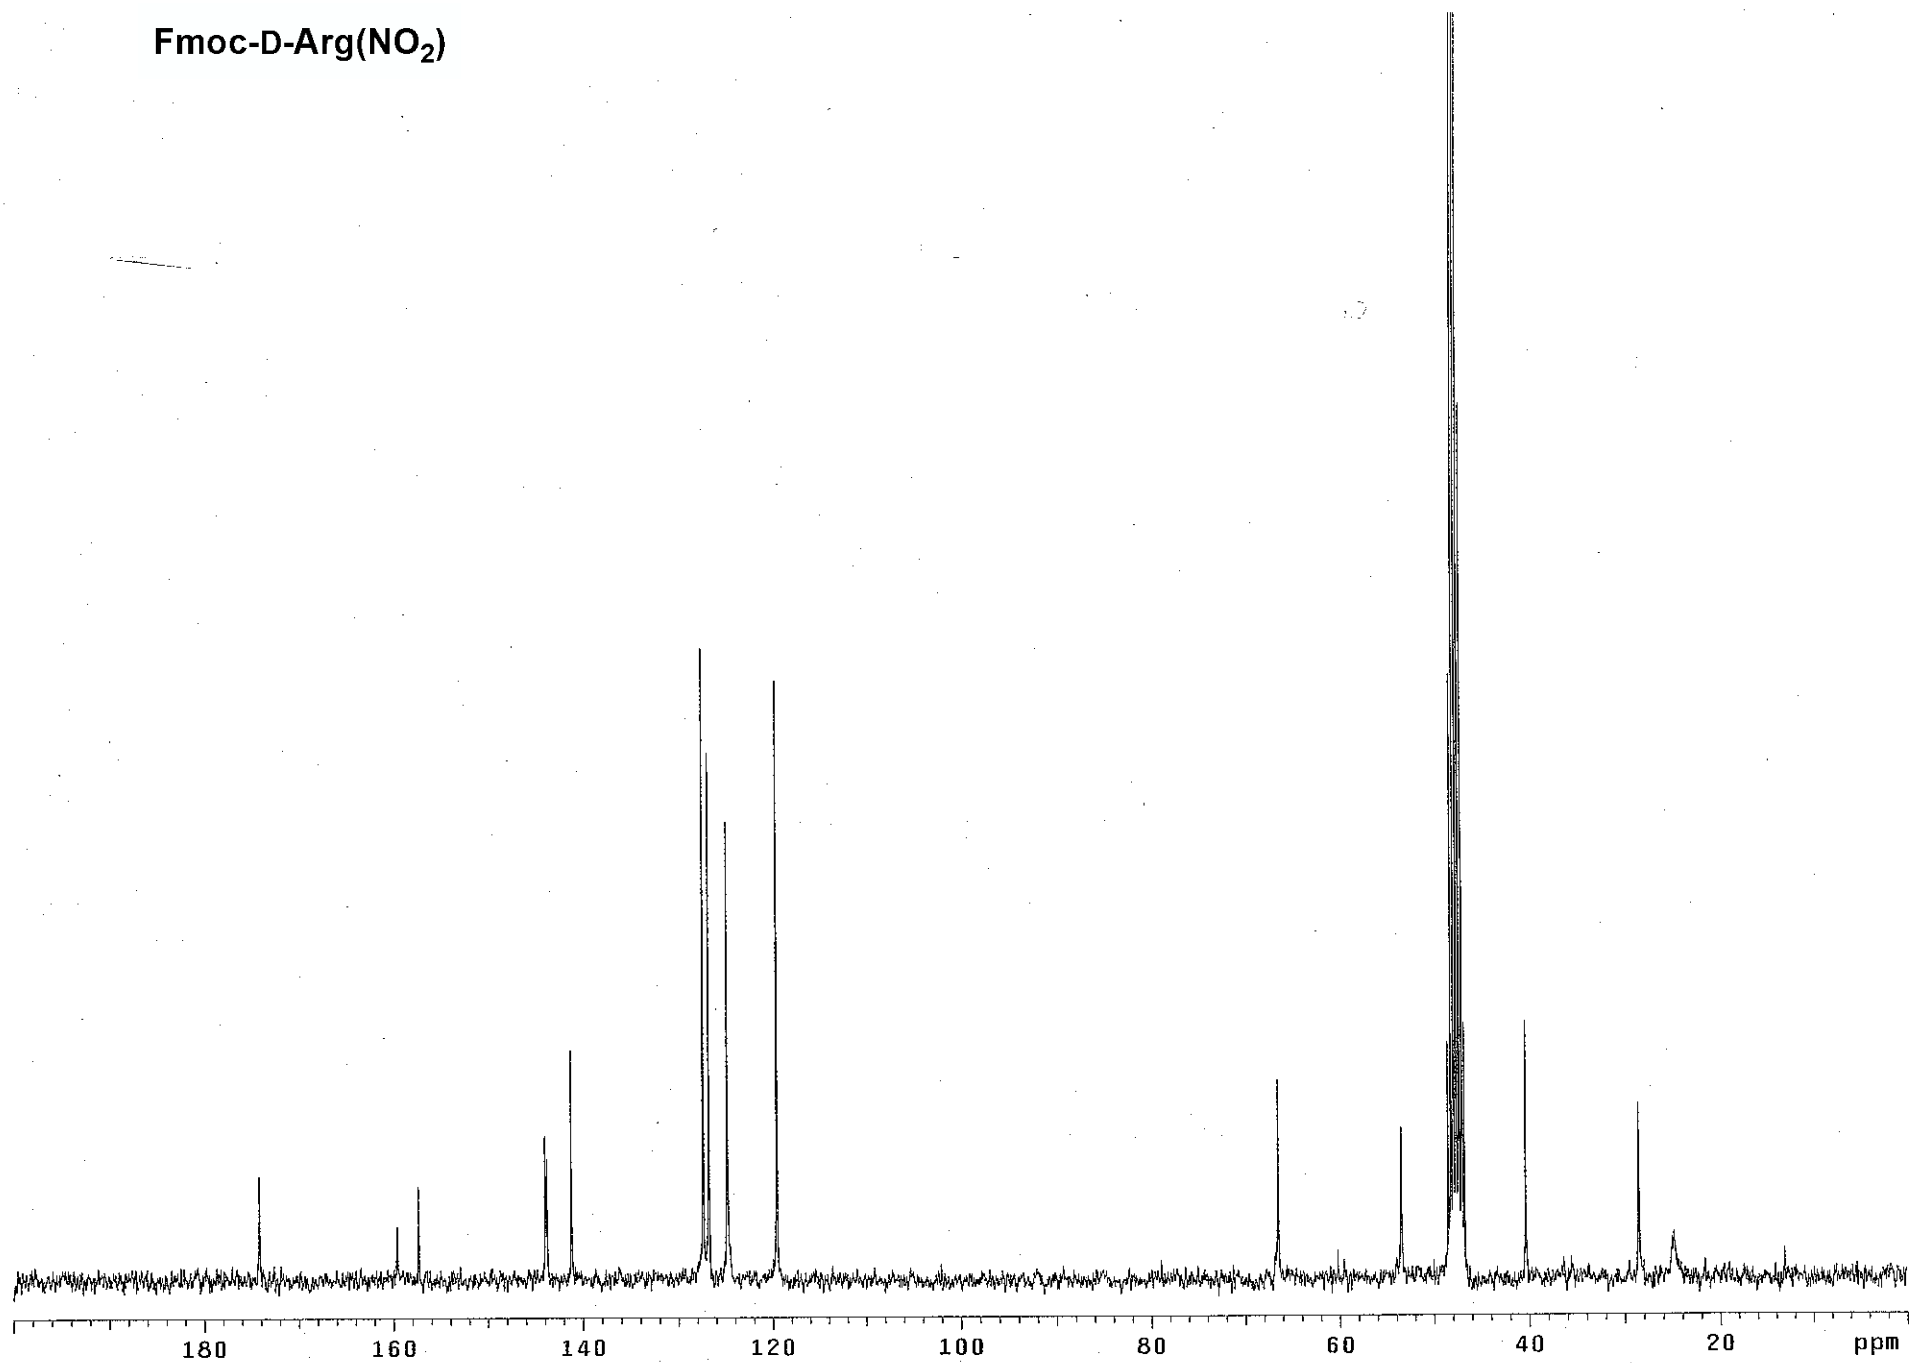

Fmoc-D-aThr-OAllyl

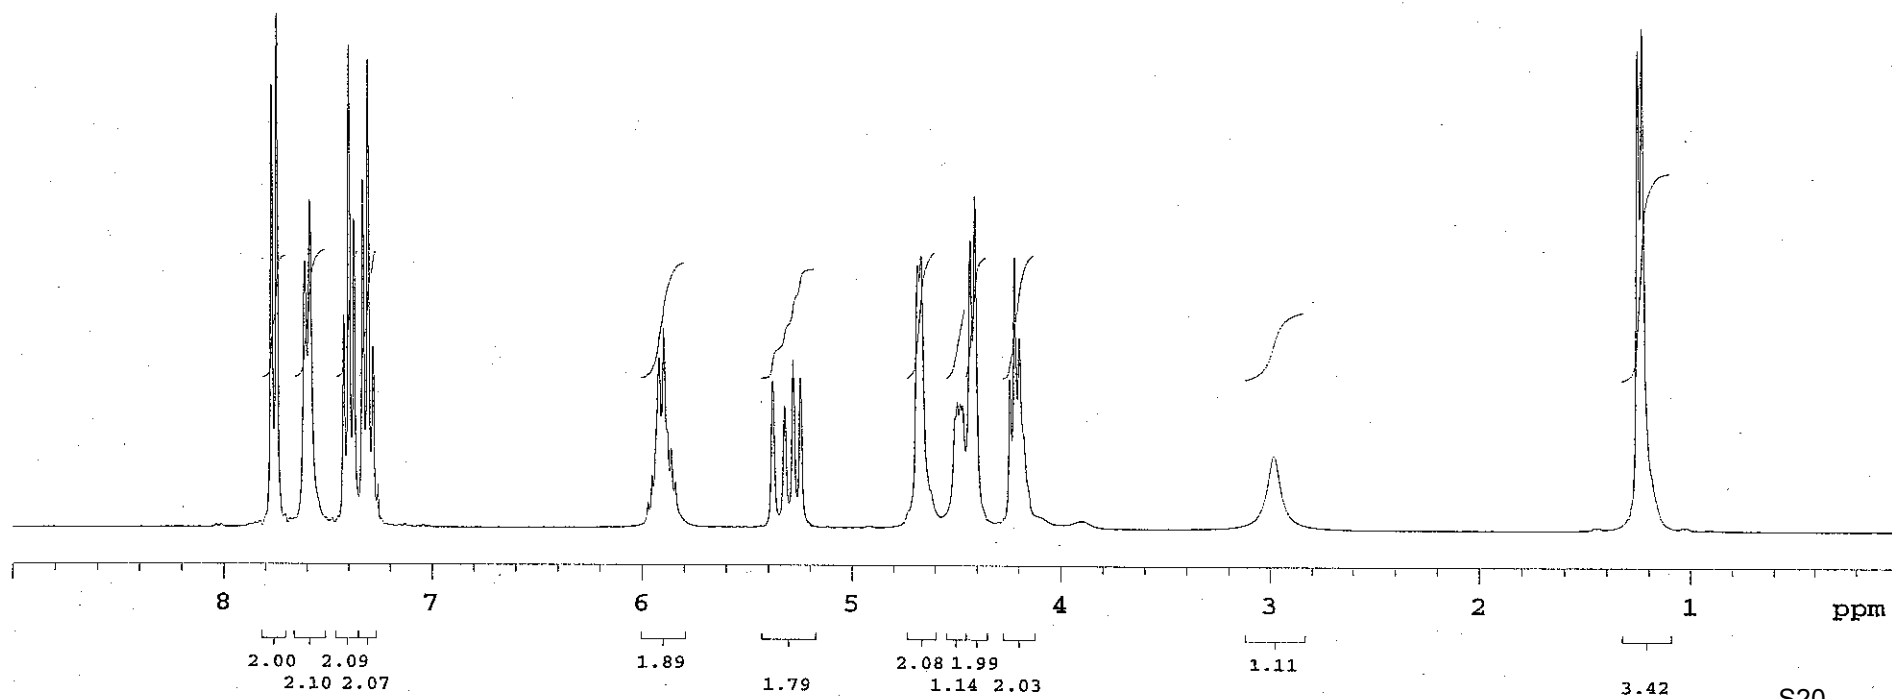

Fmoc-D- $\alpha$ Thr-OAllyl

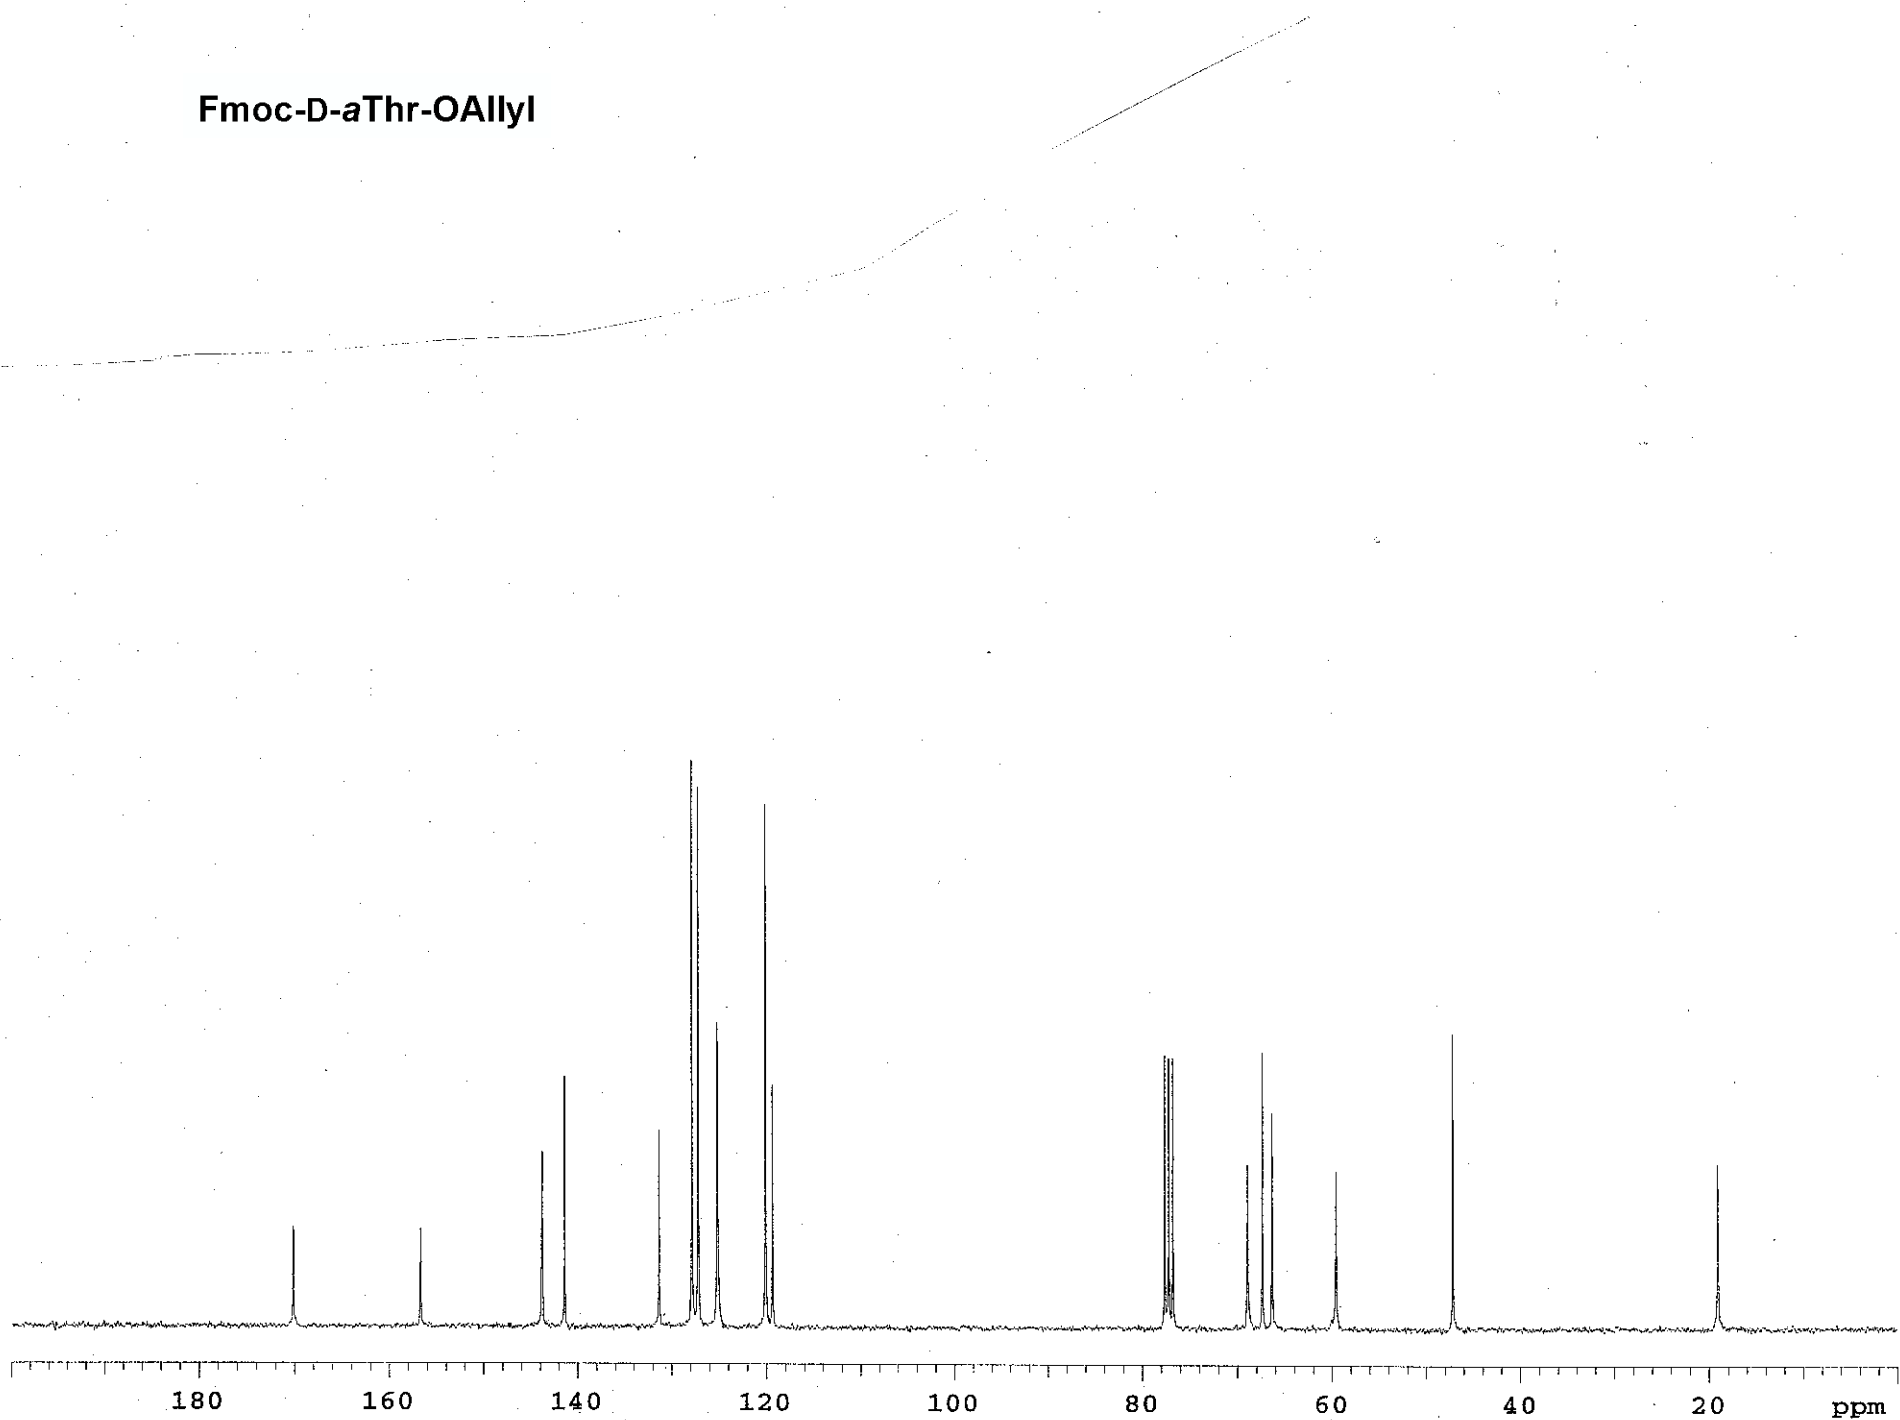

Fmoc-L-Thr-OAllyl

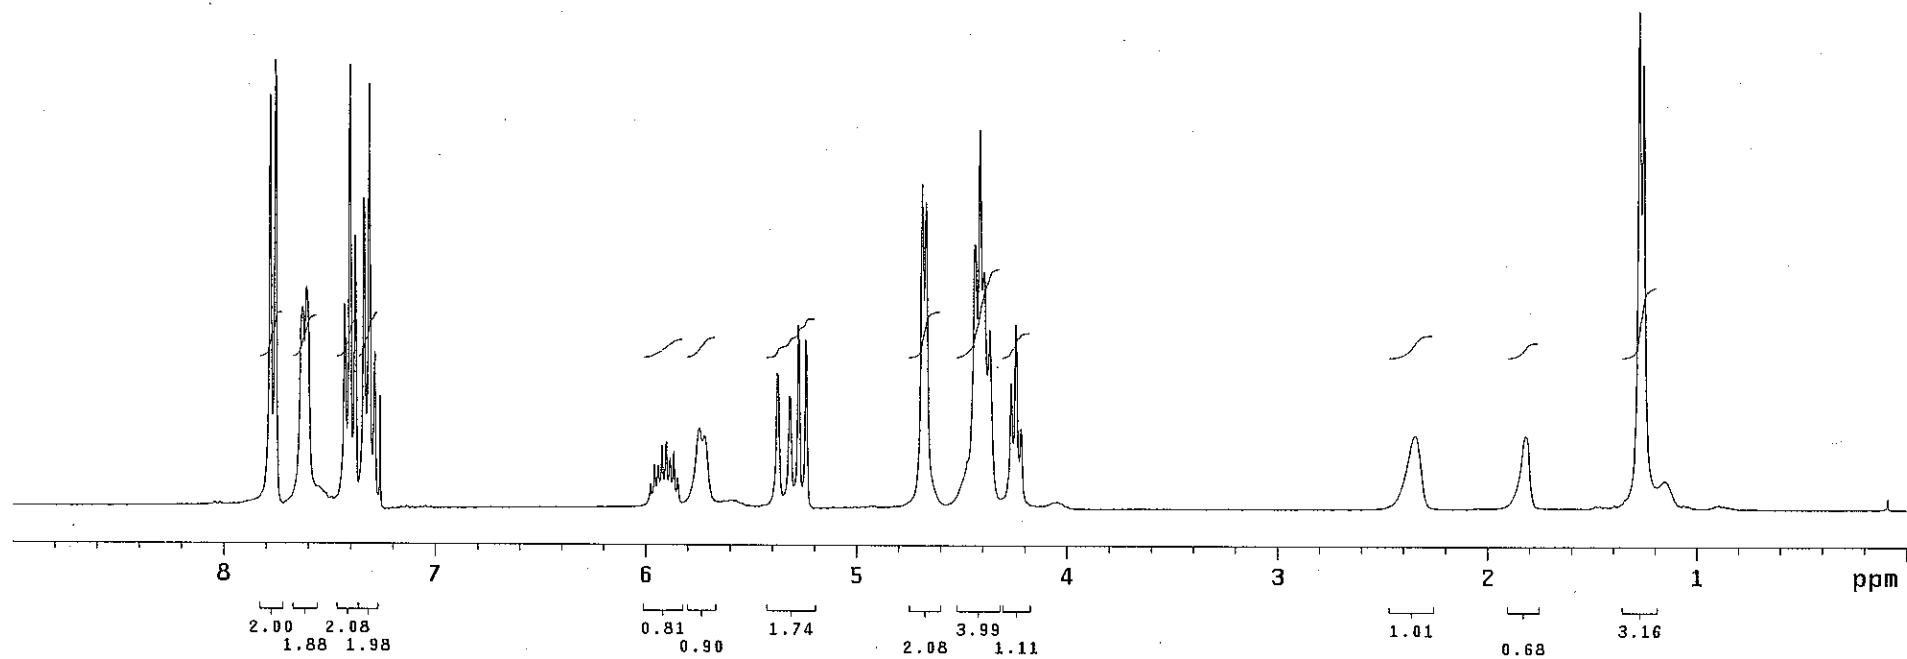

Fmoc-L-Thr-OAllyl

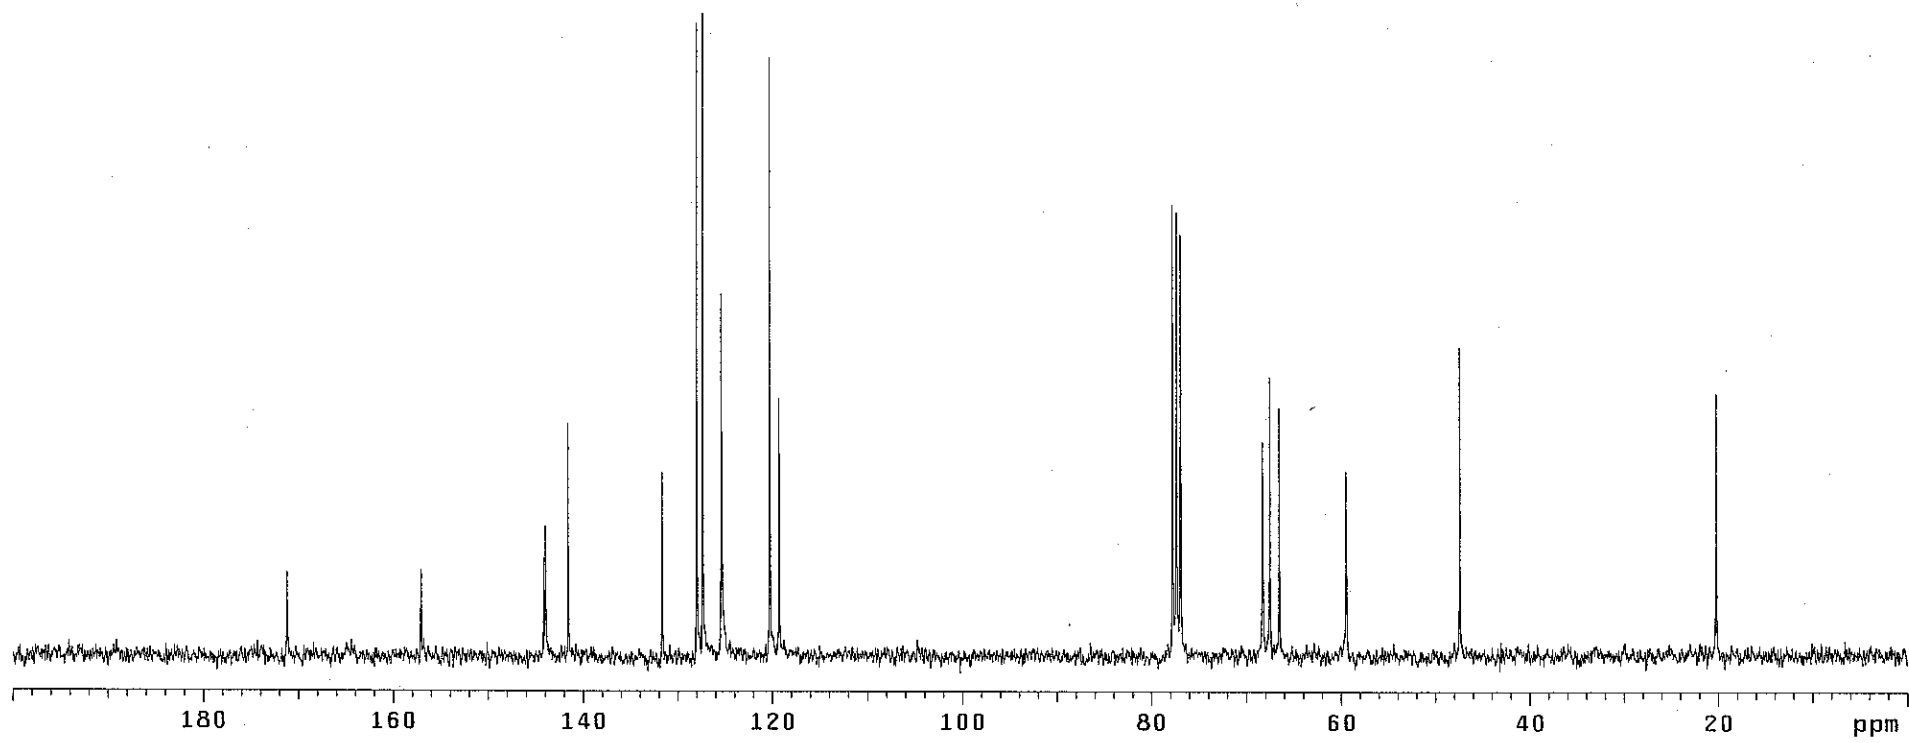

Fmoc-D- $\alpha$ Thr(THP)-OAllyl

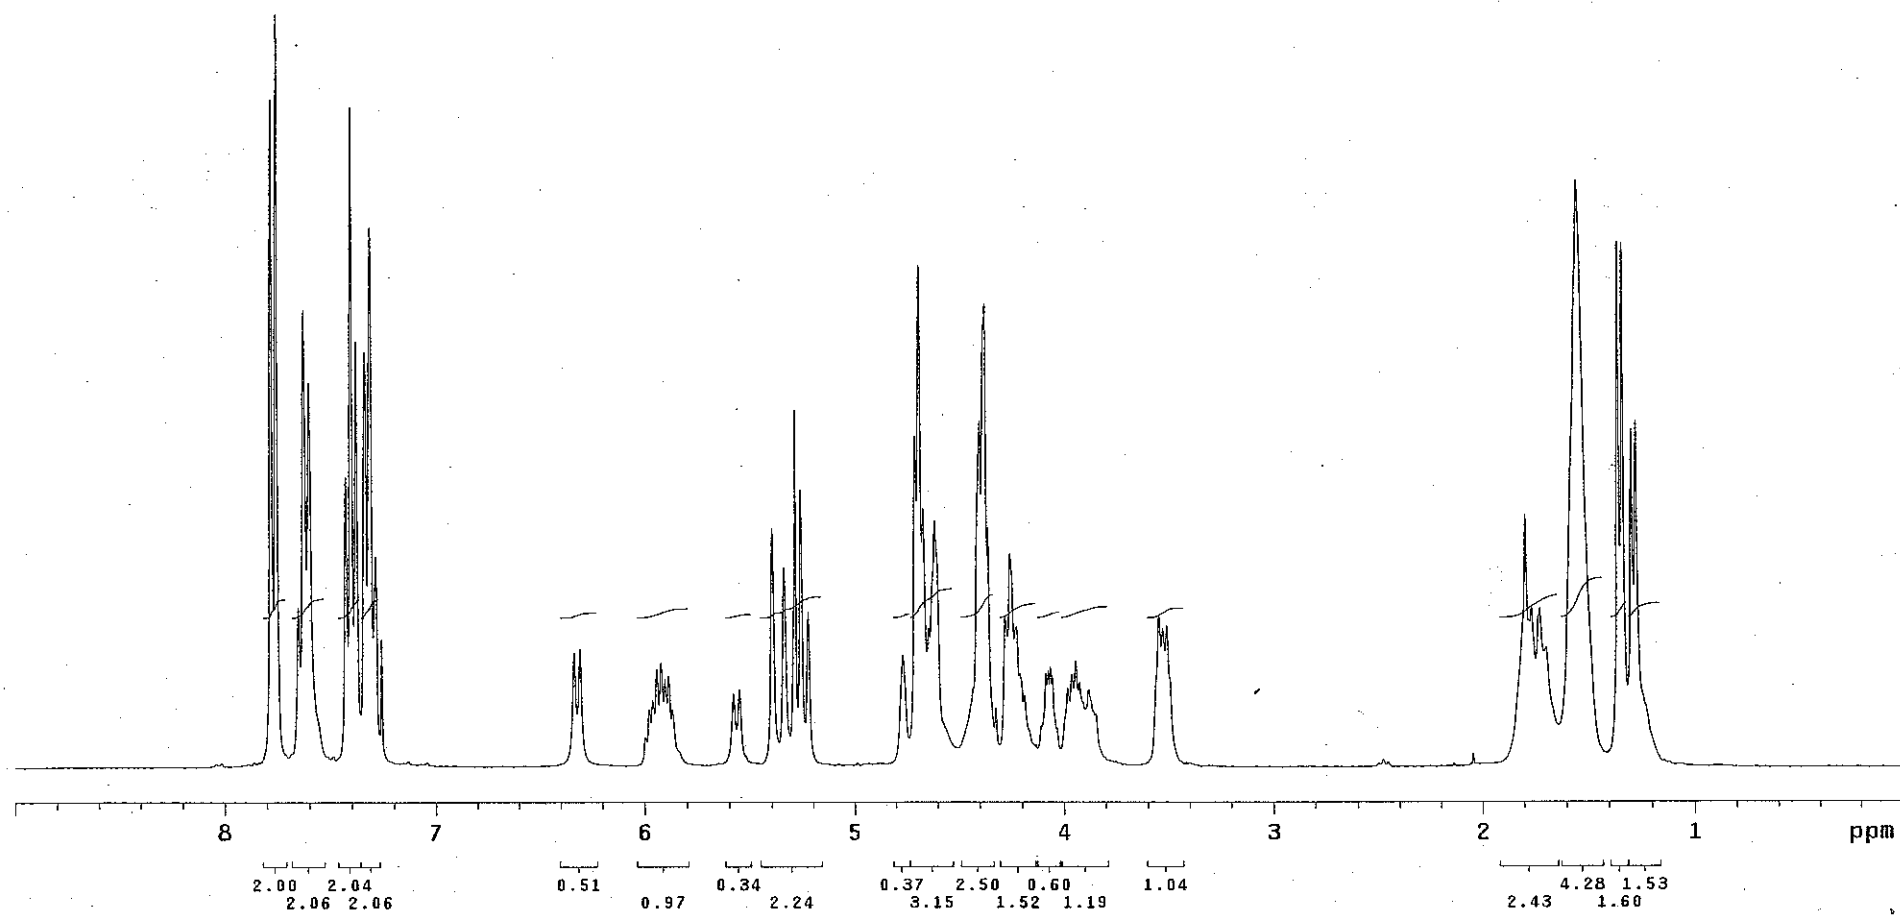

Fmoc-D- $\alpha$ Thr(THP)-OAllyl

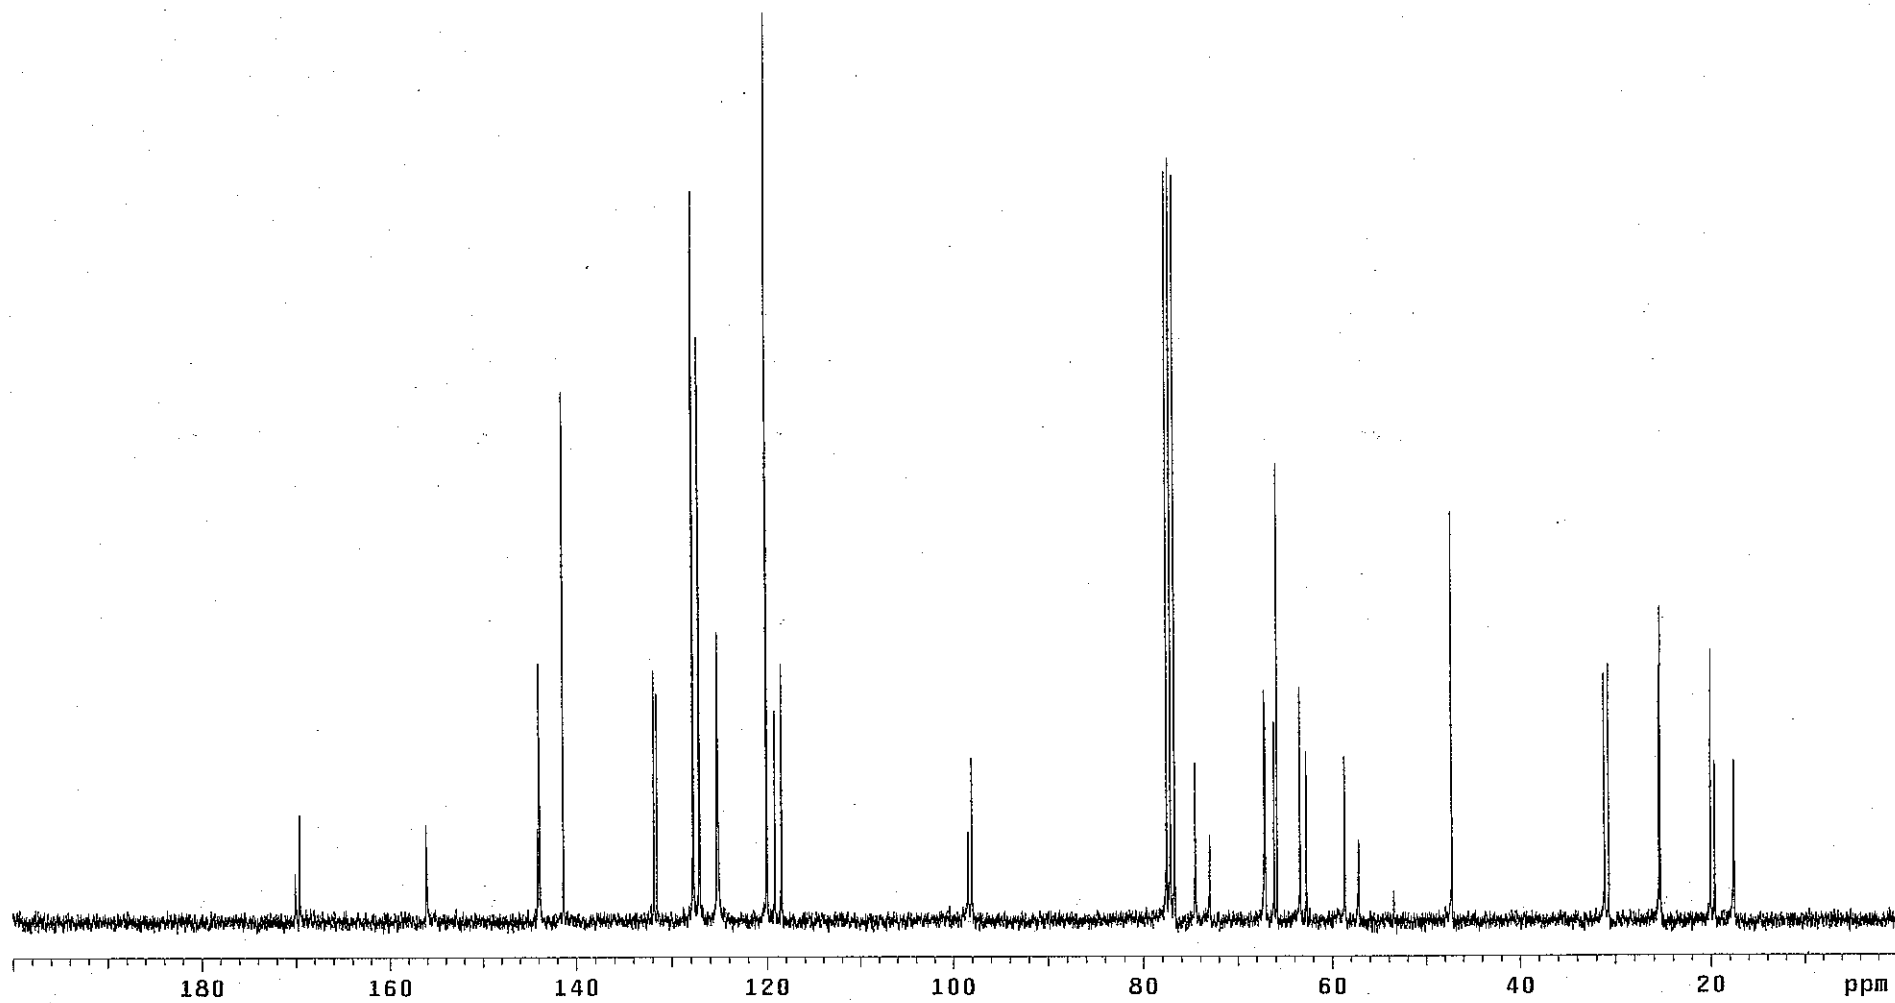



# Fmoc-L-Thr(THP)-OAllyl

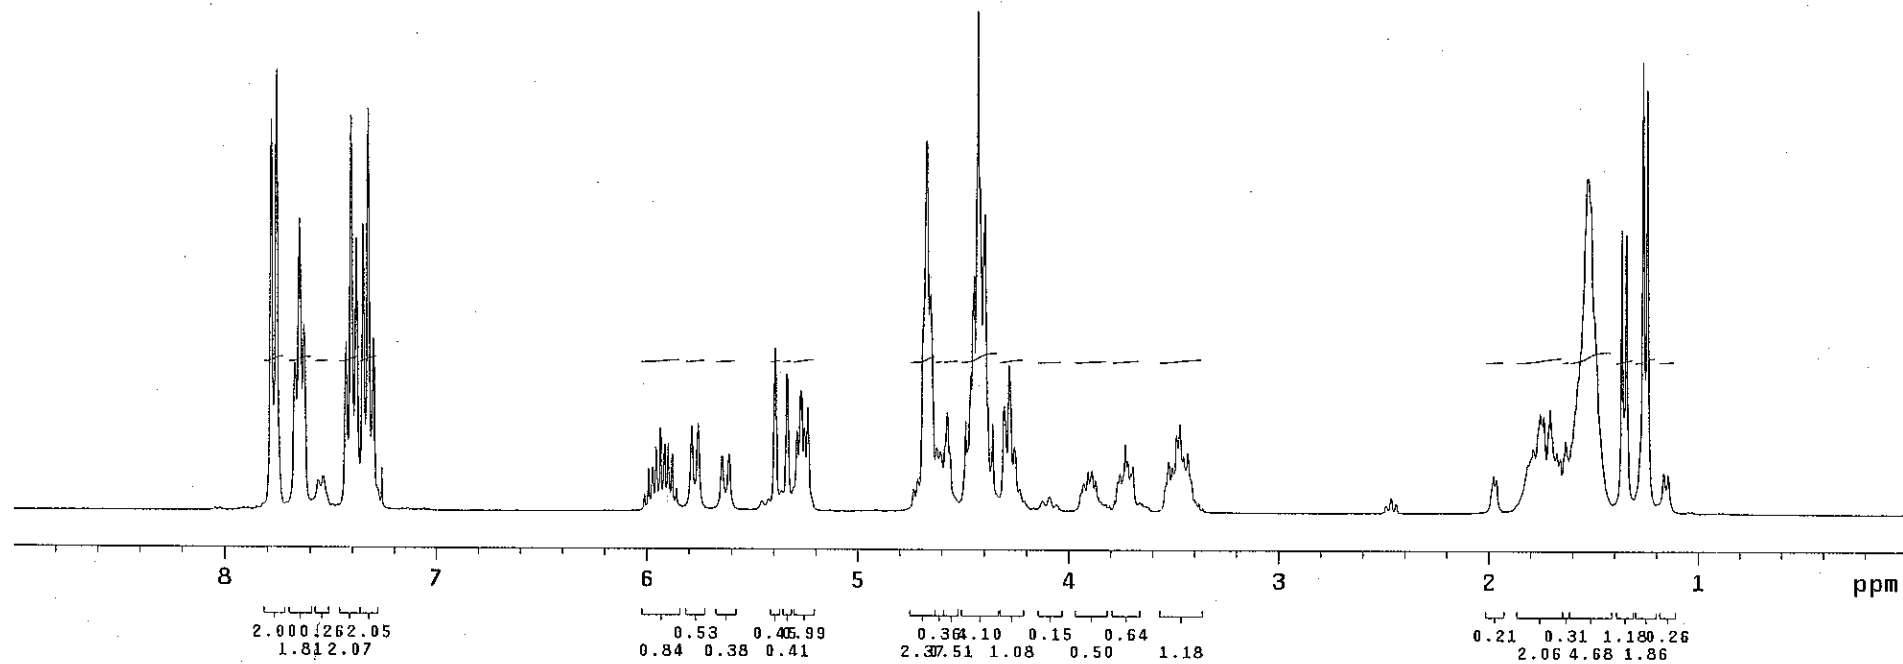

Fmoc-L-Thr(THP)-OAllyl

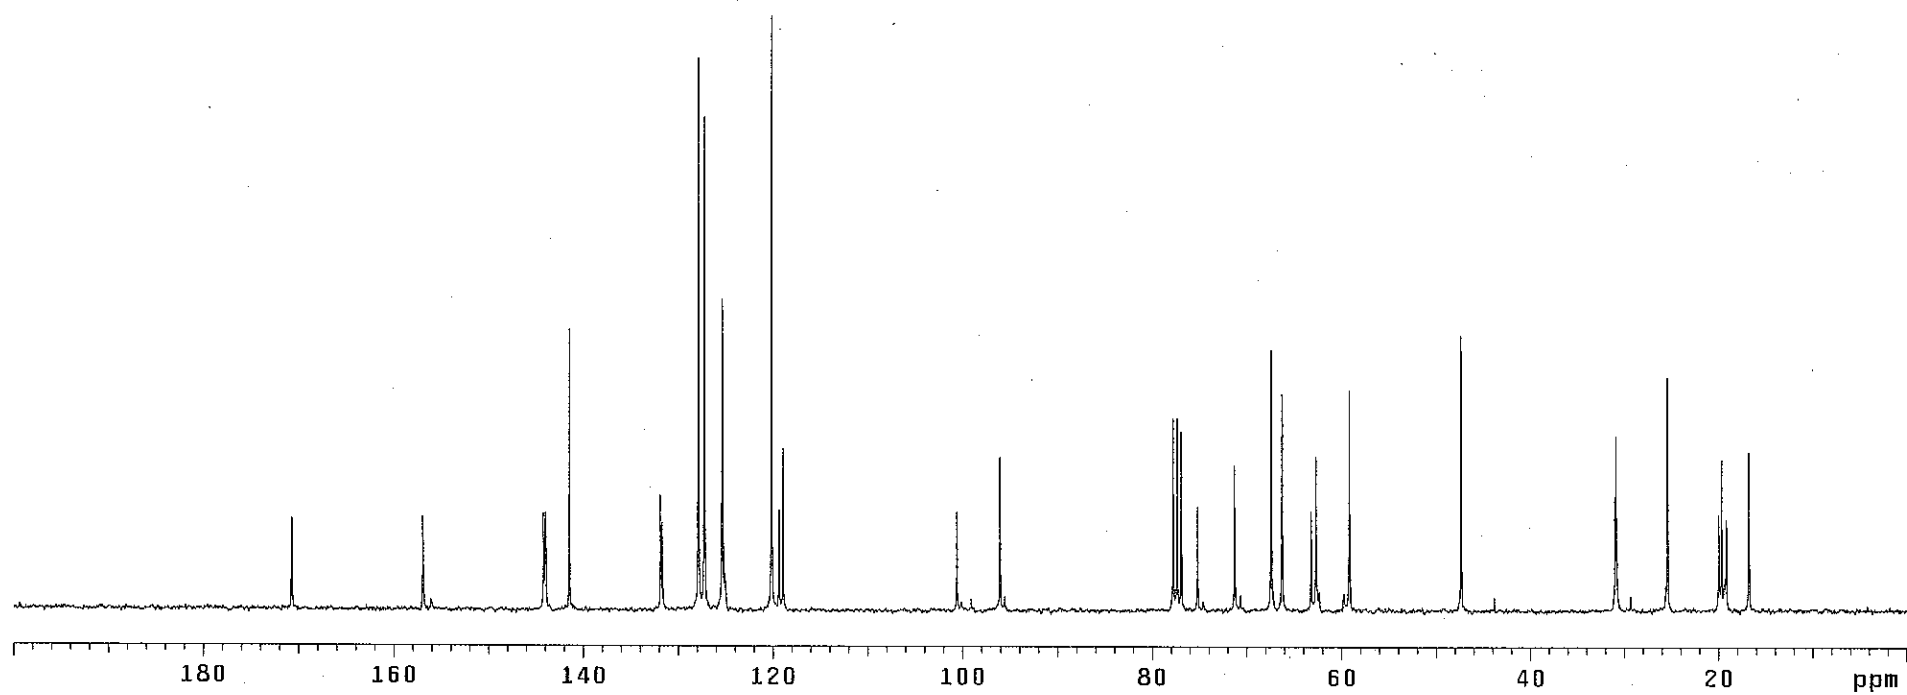

Alloc-MeAla

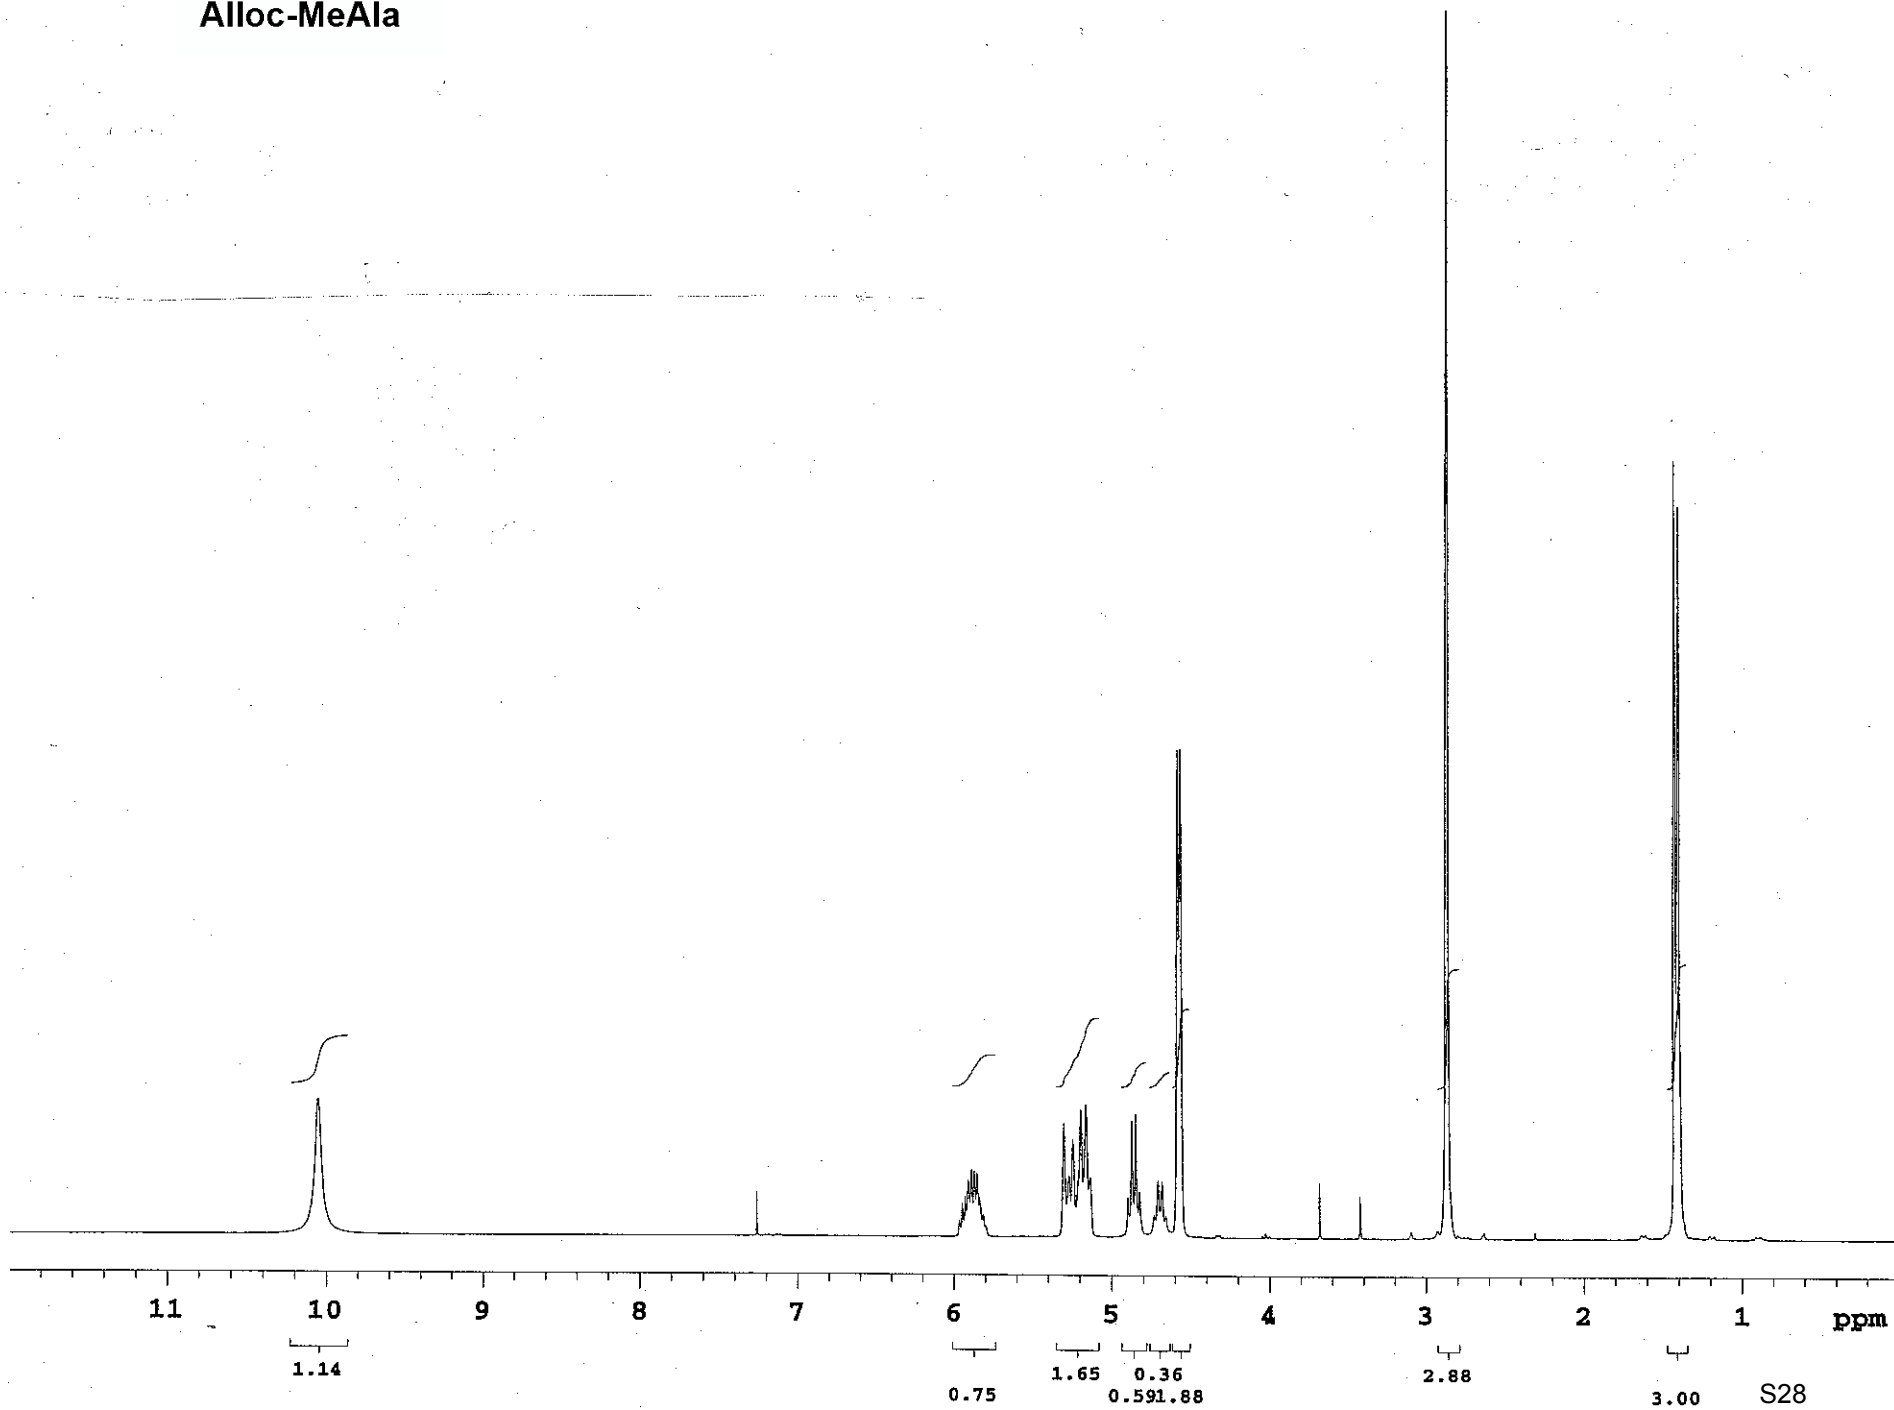

Alloc-MeAla

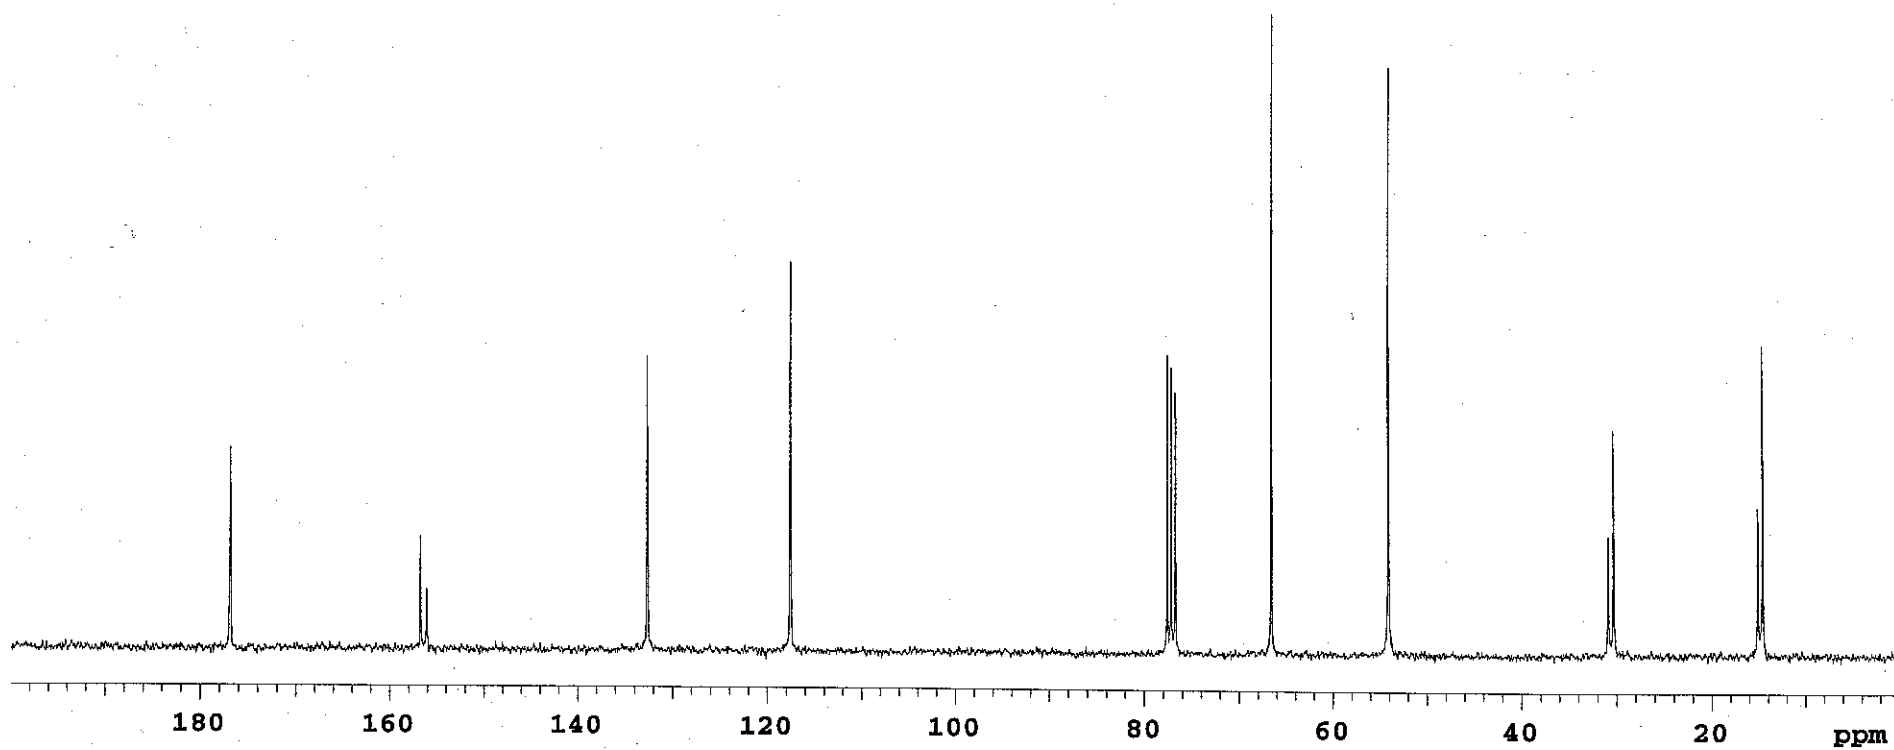

# Natural Callipeltin B

Callipeltin B

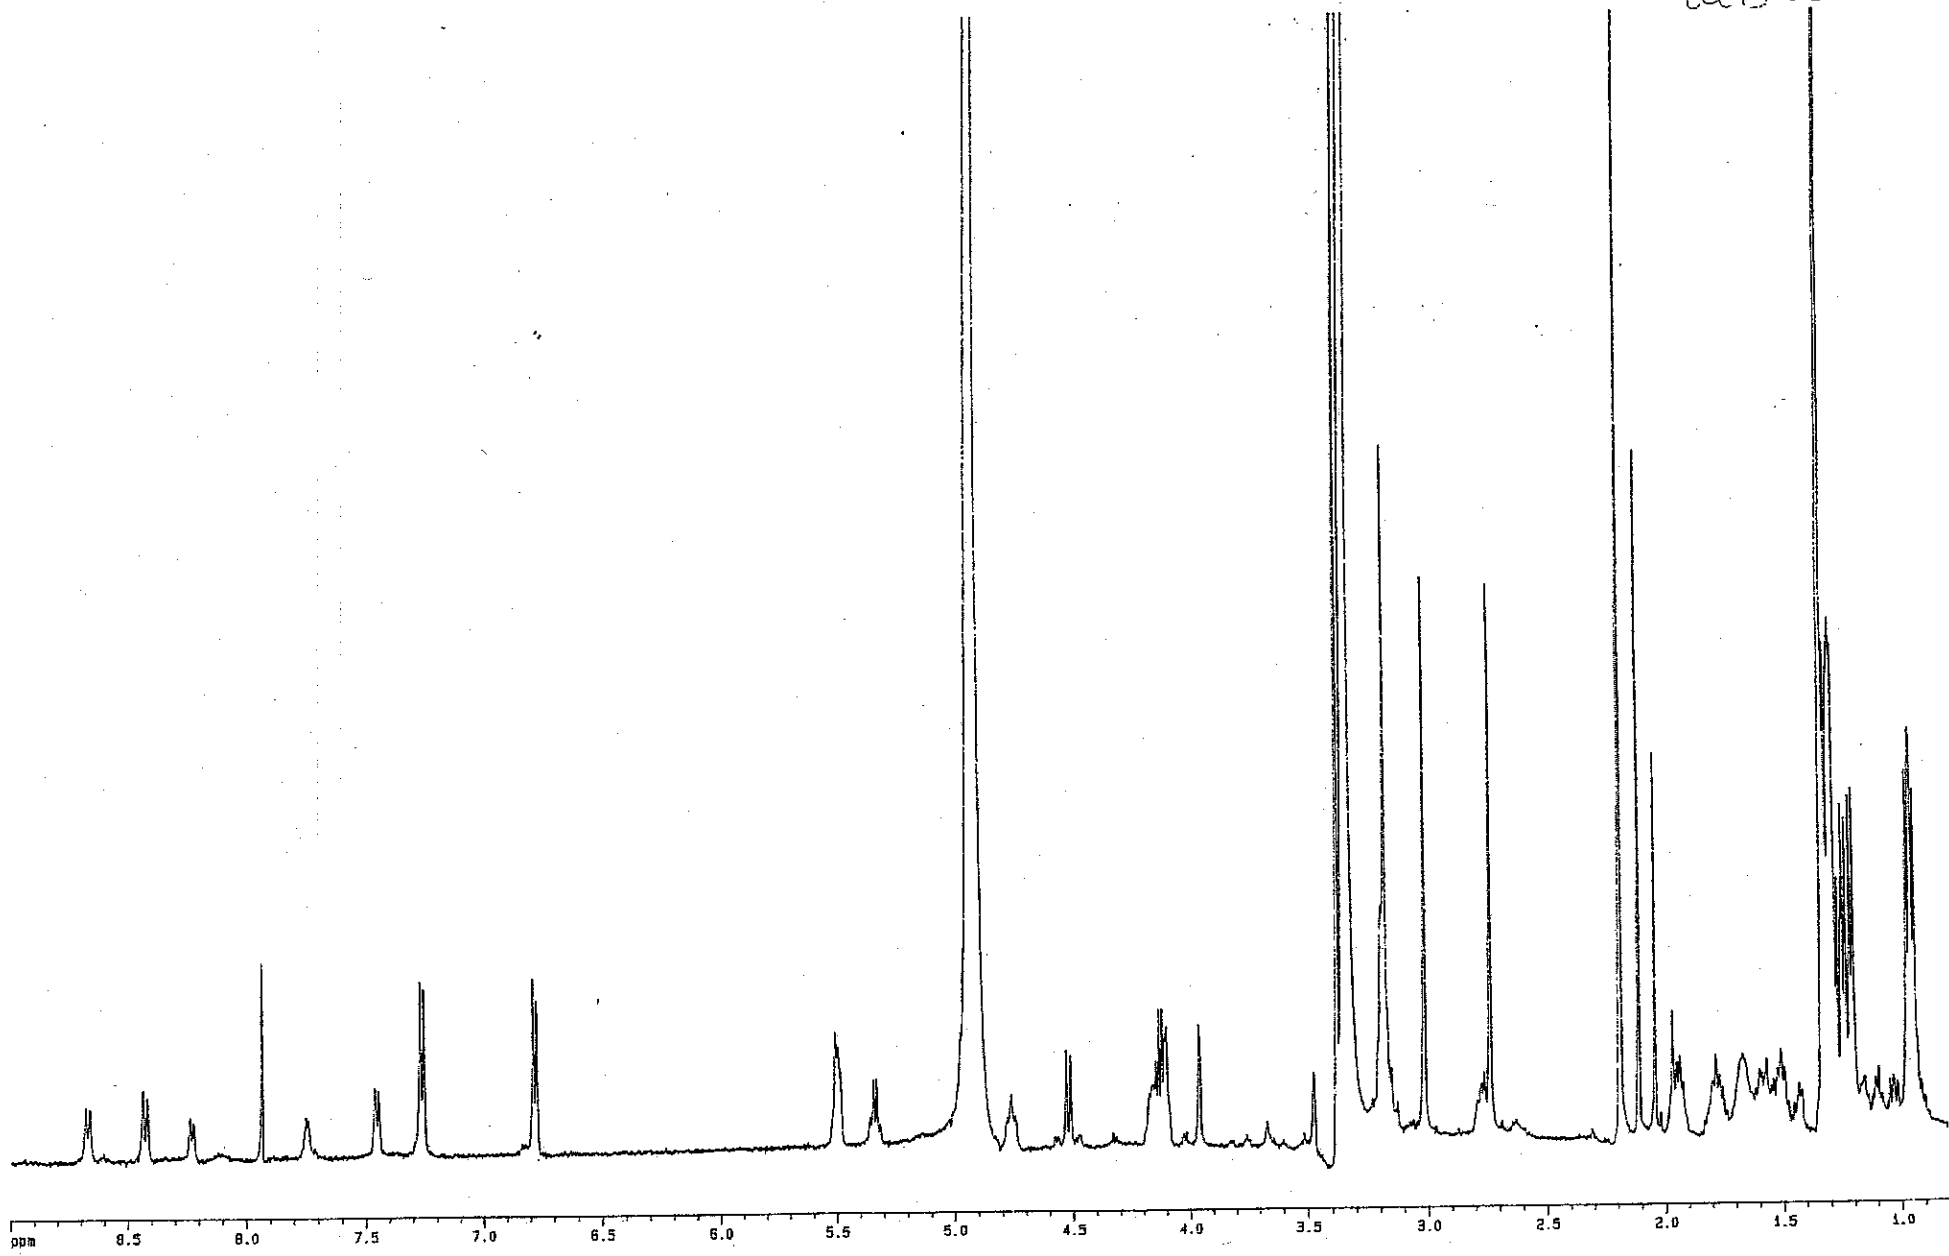

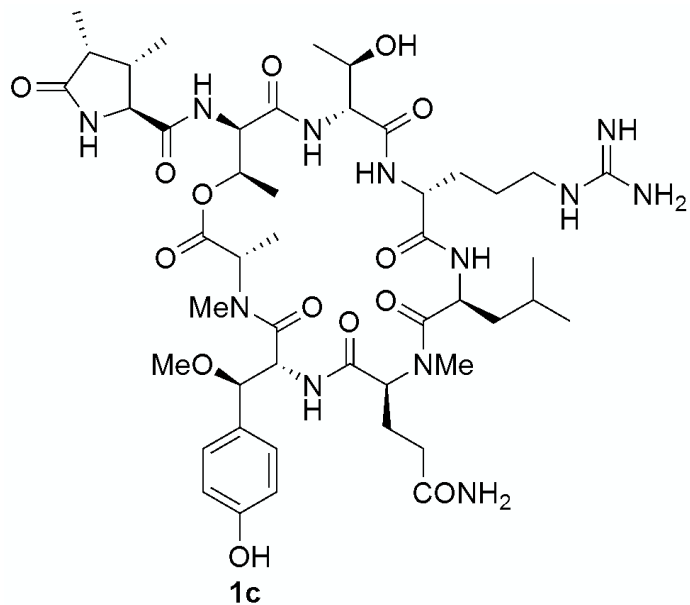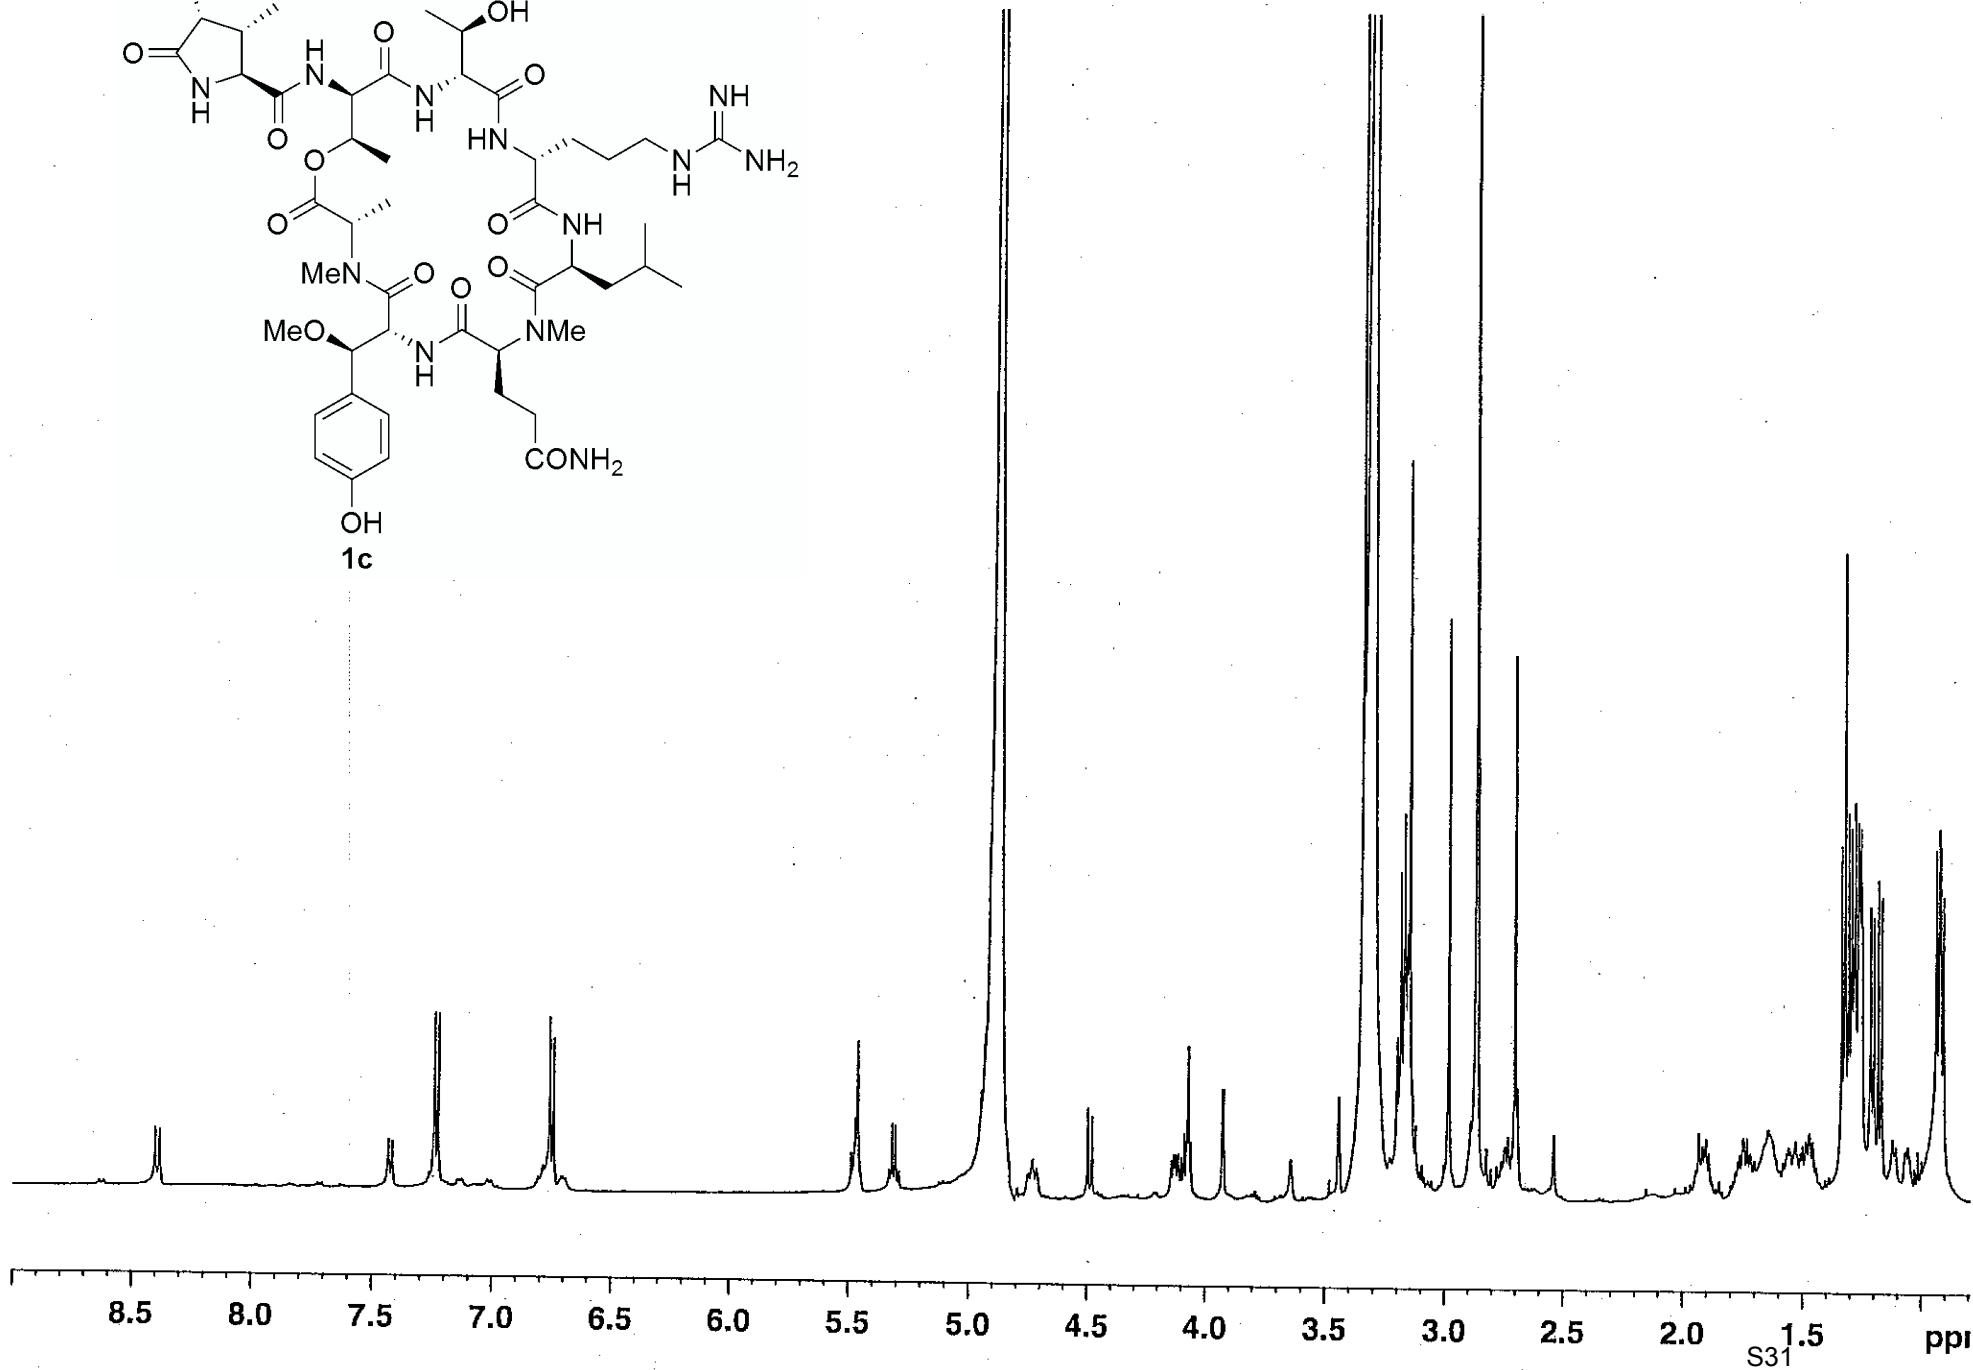

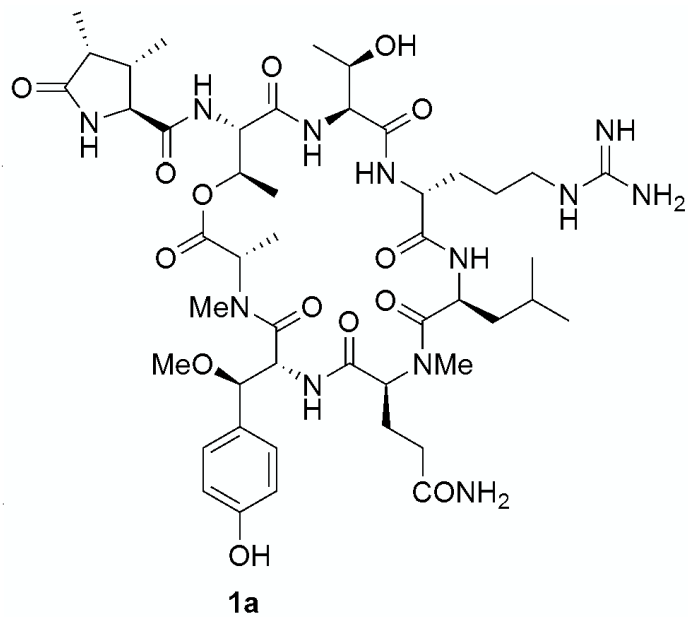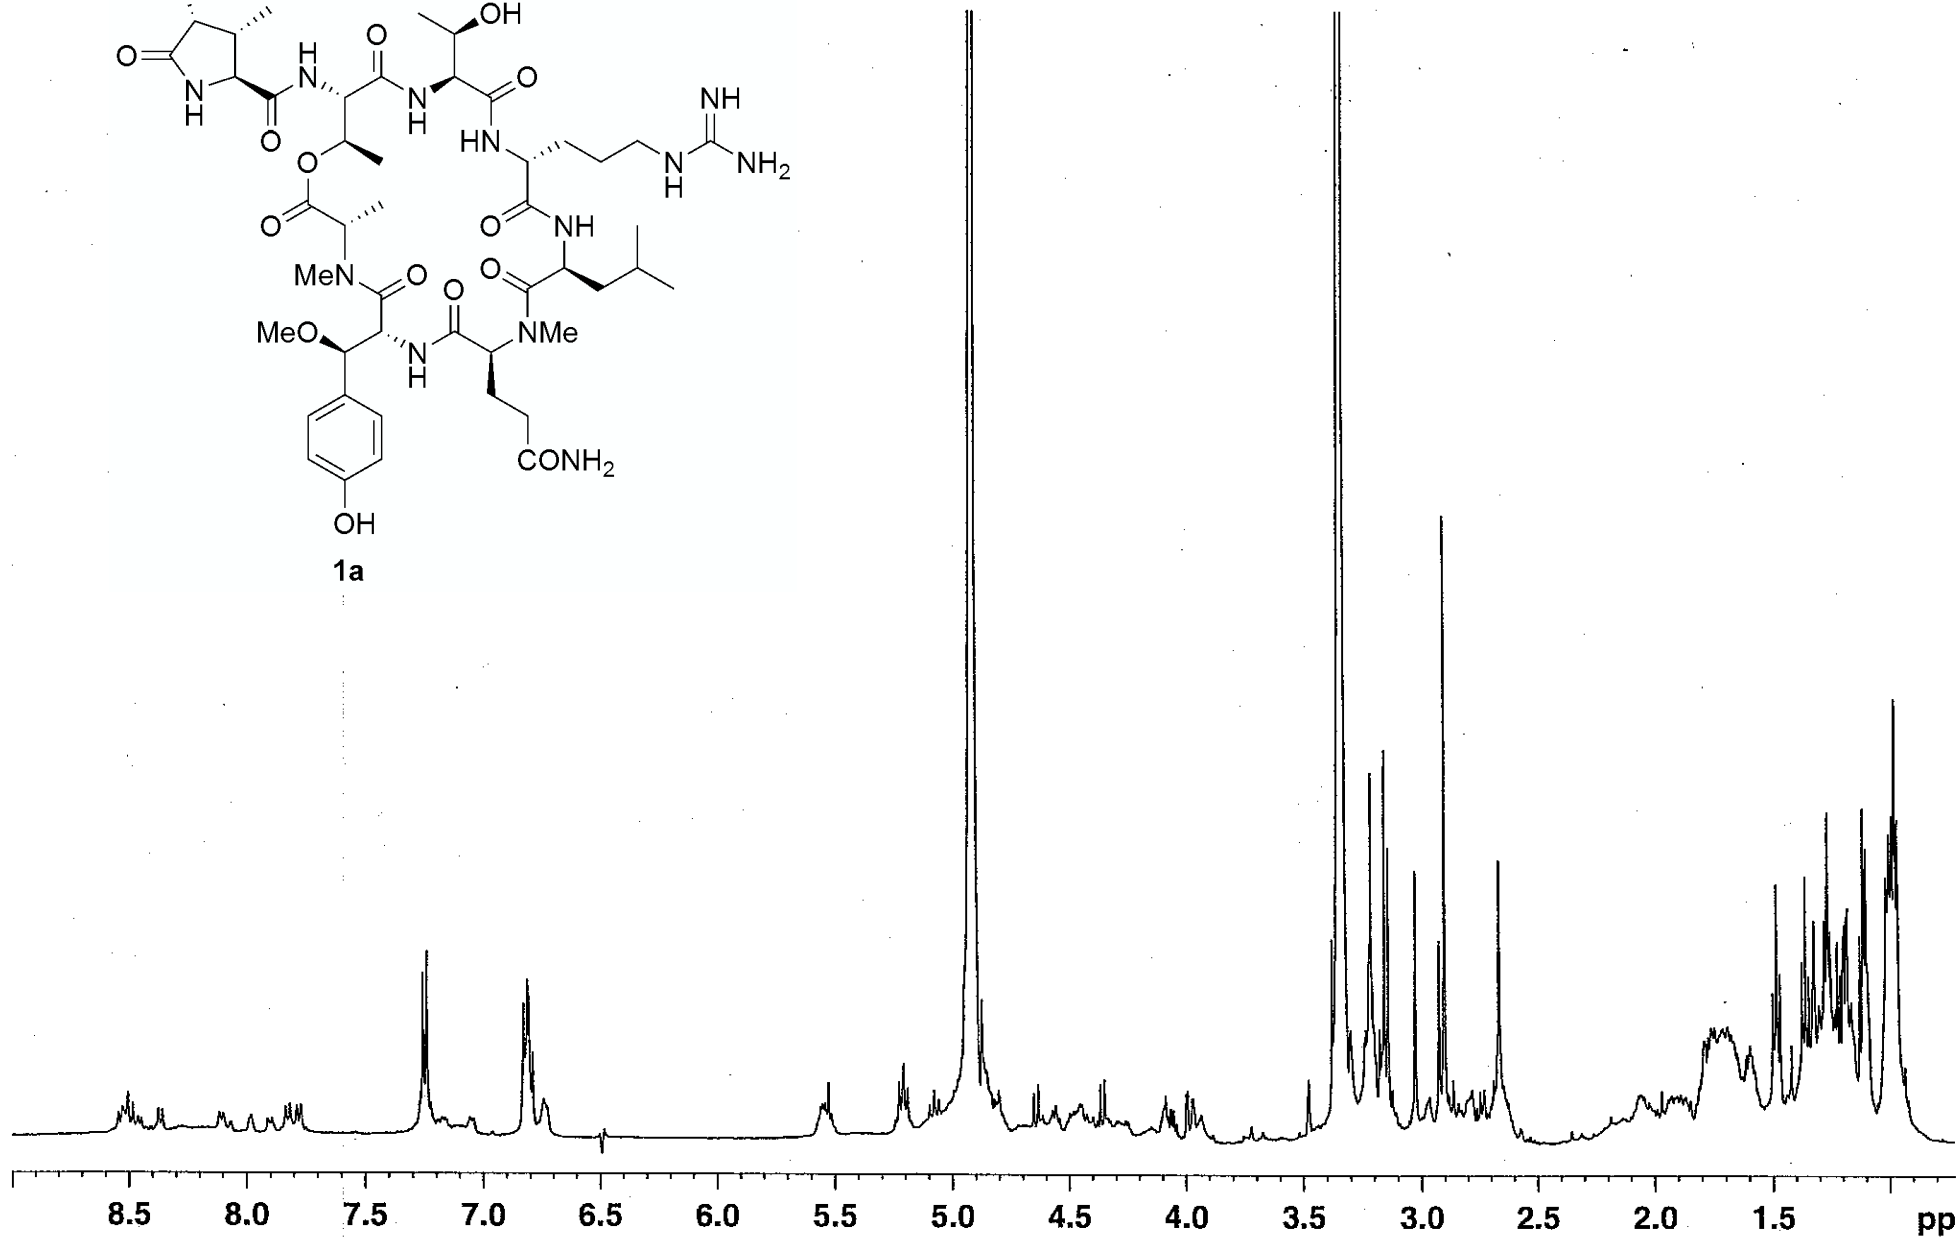

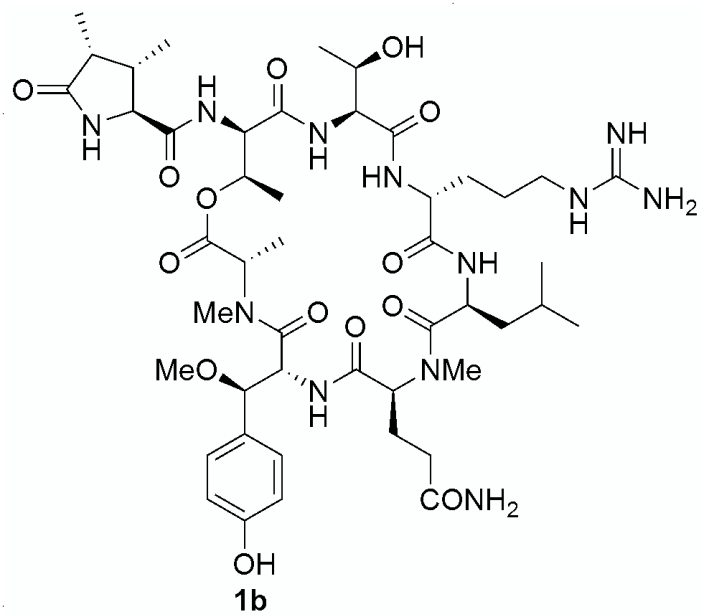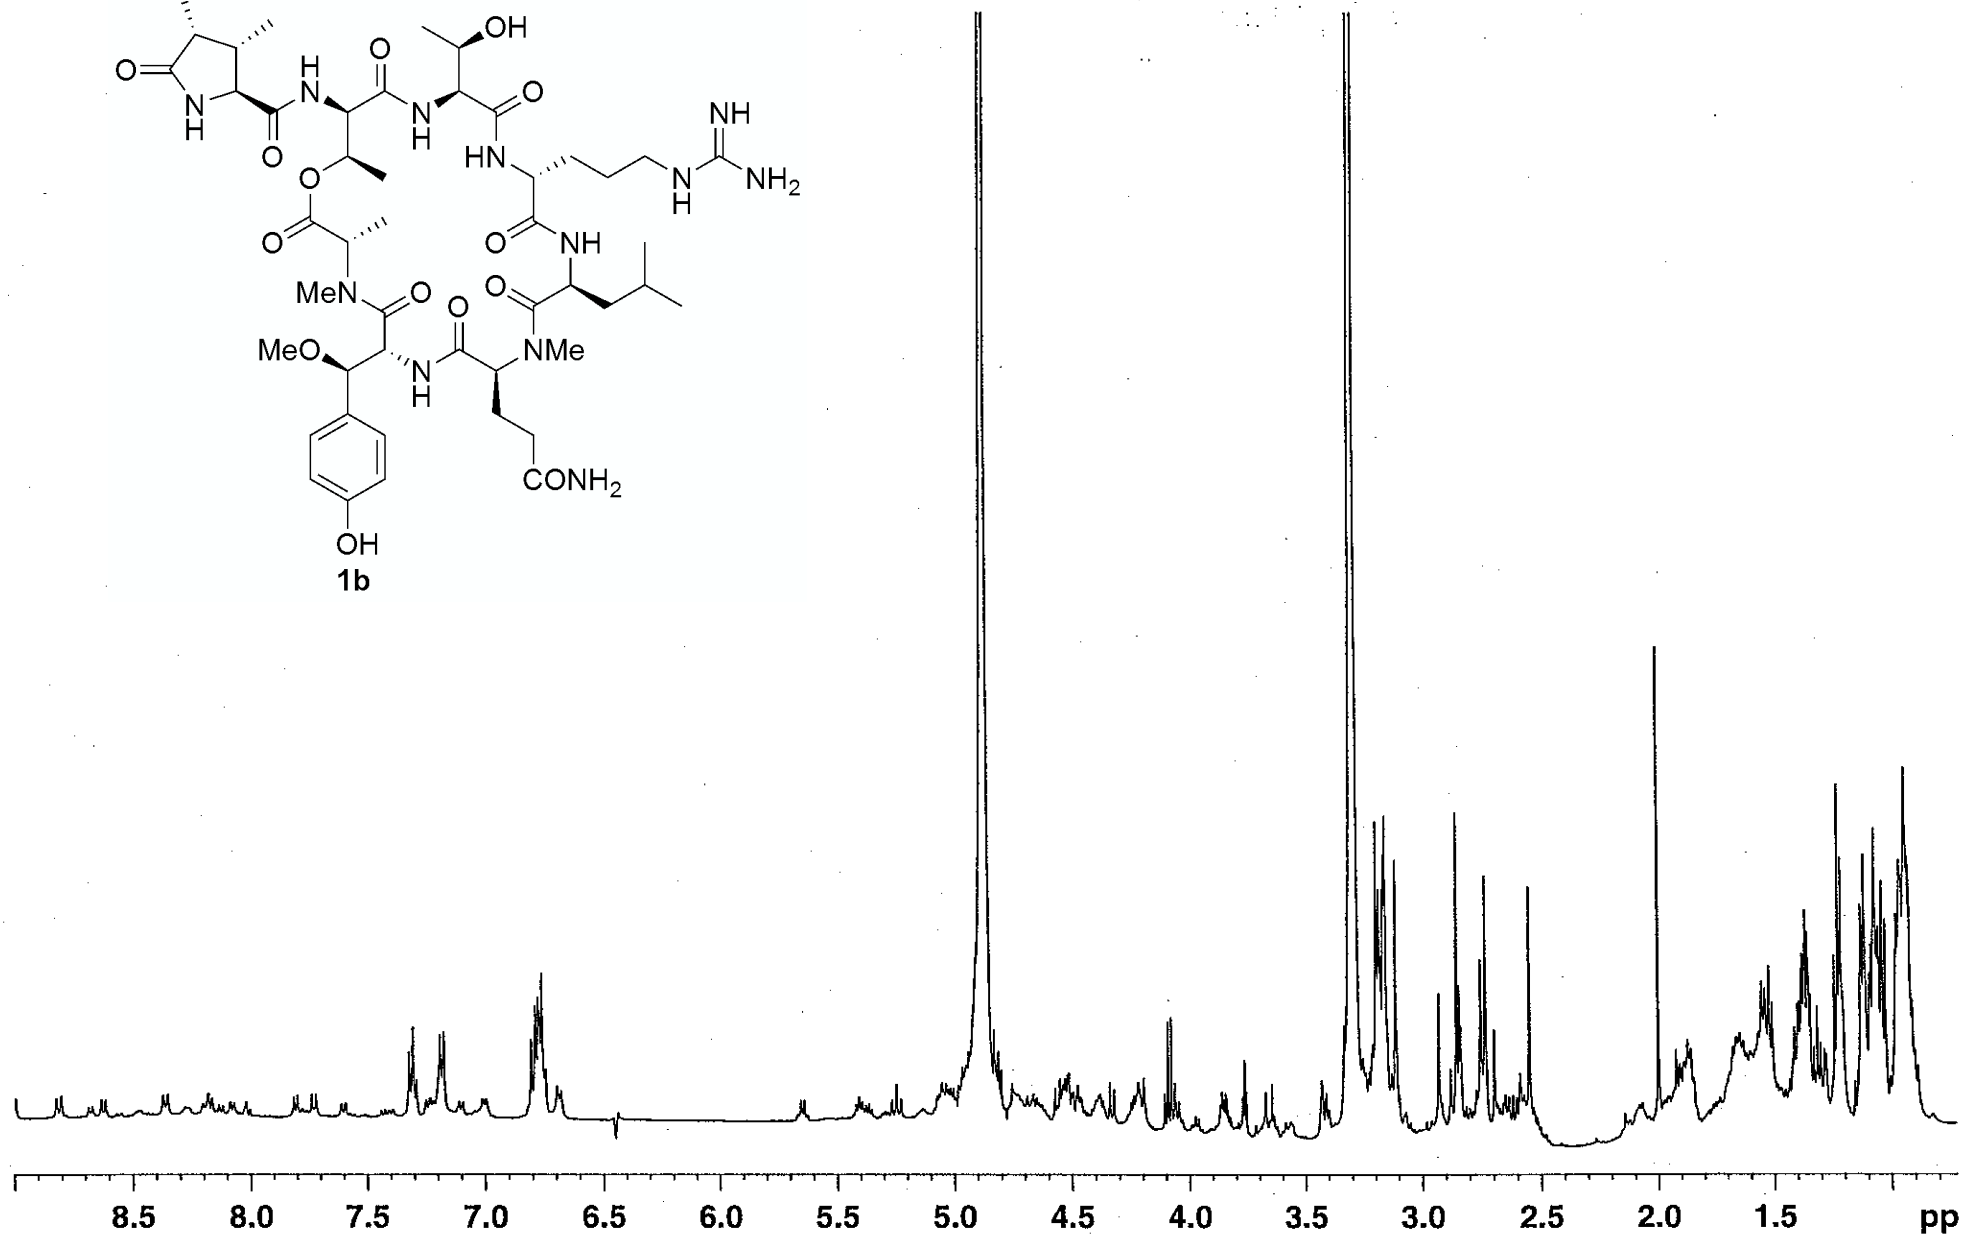



**1c**

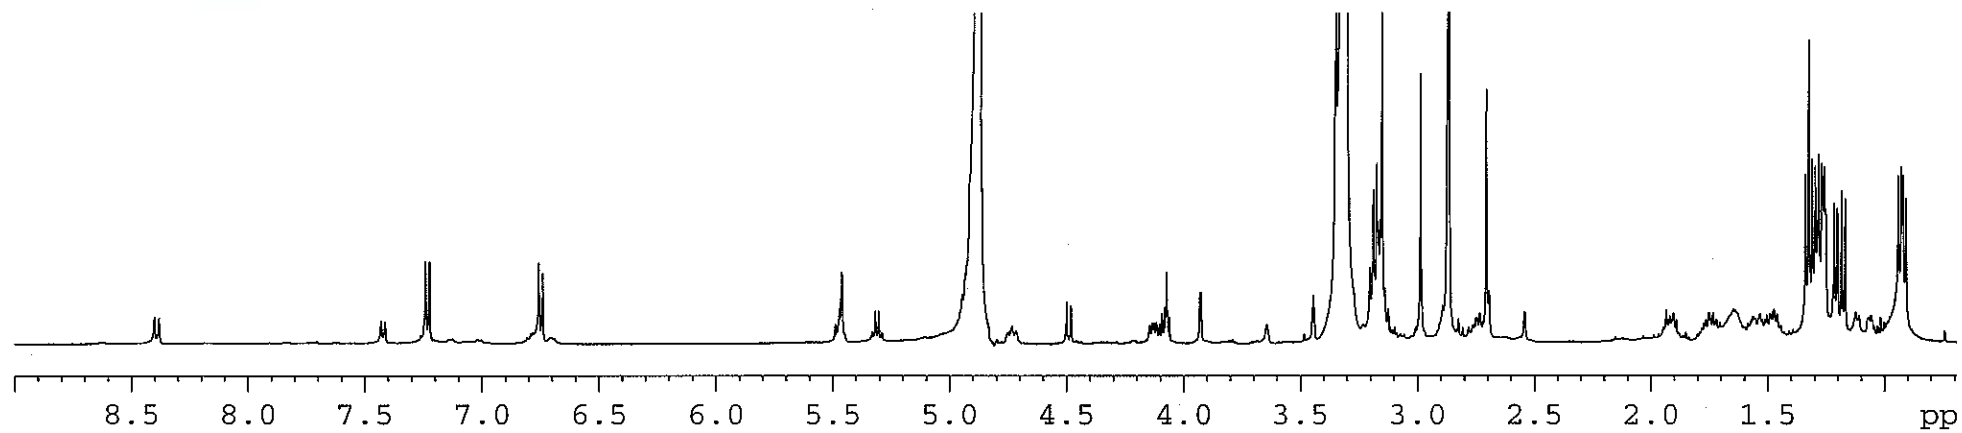

**1a**

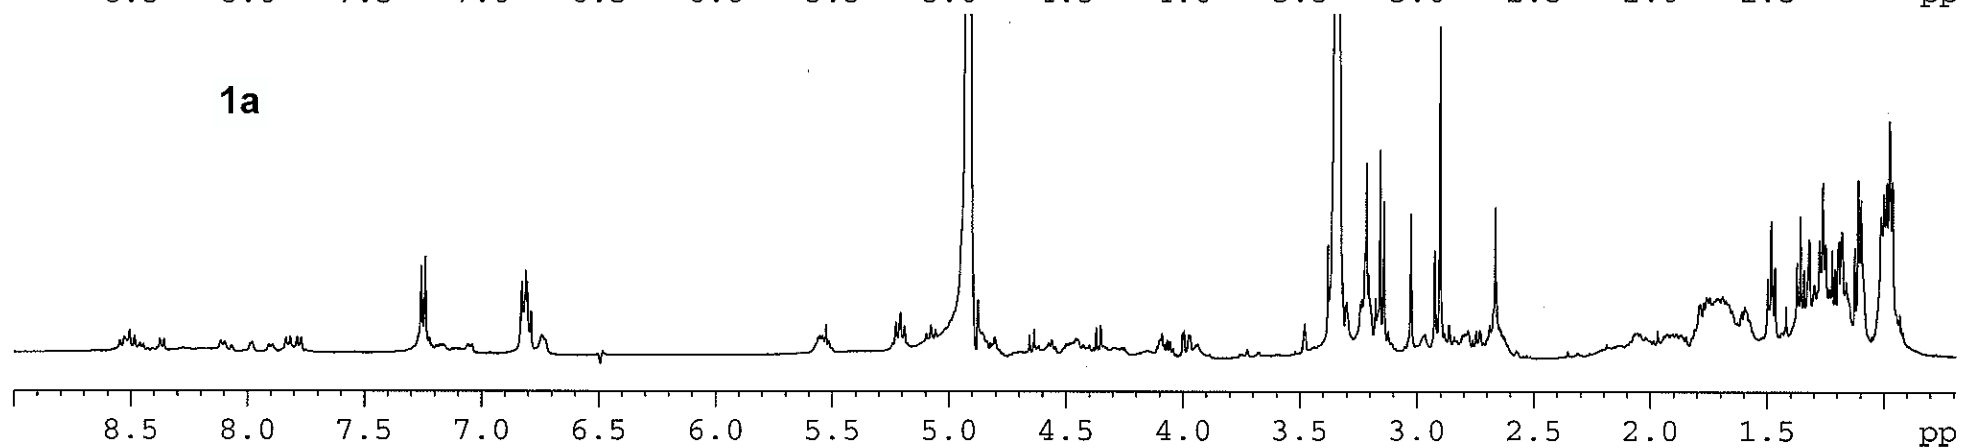

**1b**

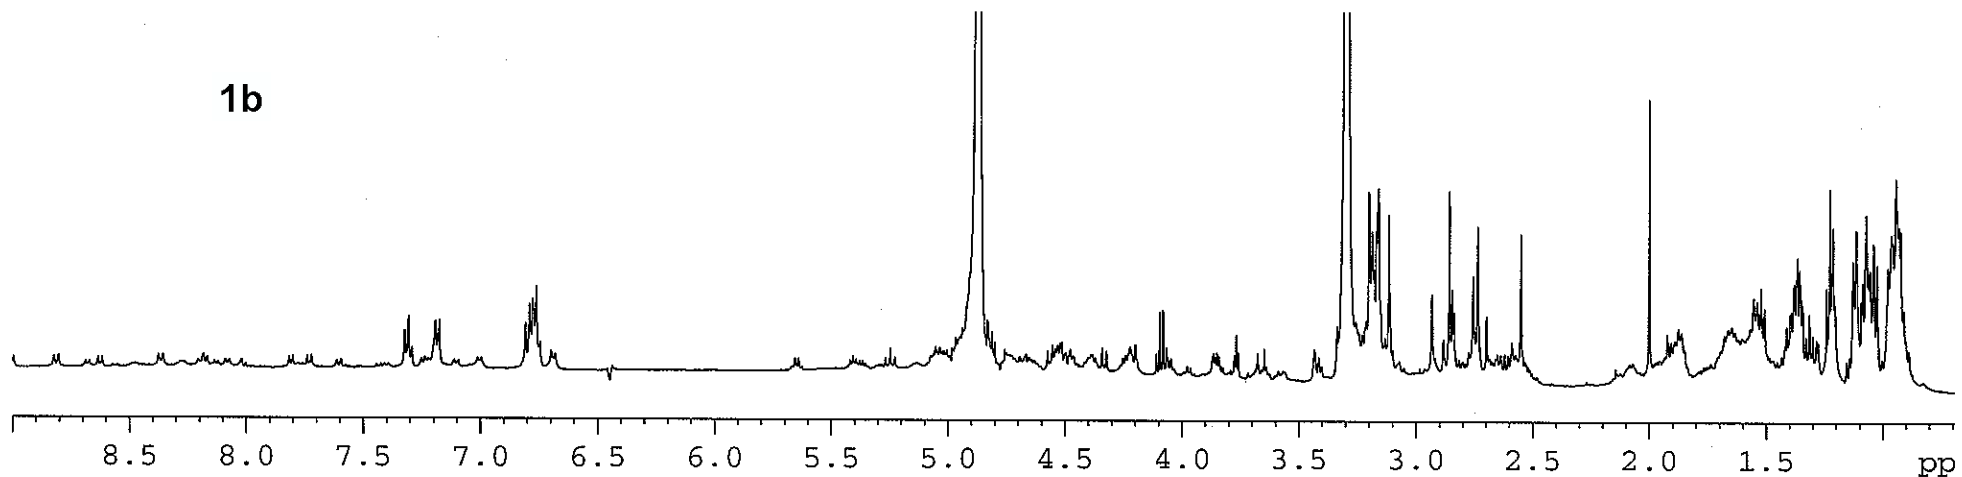

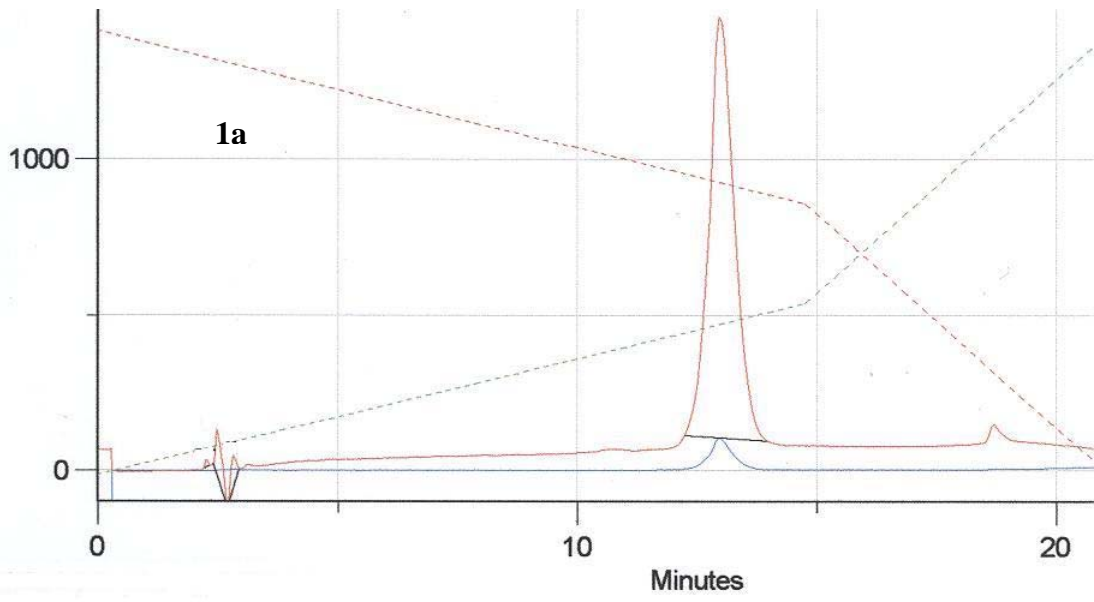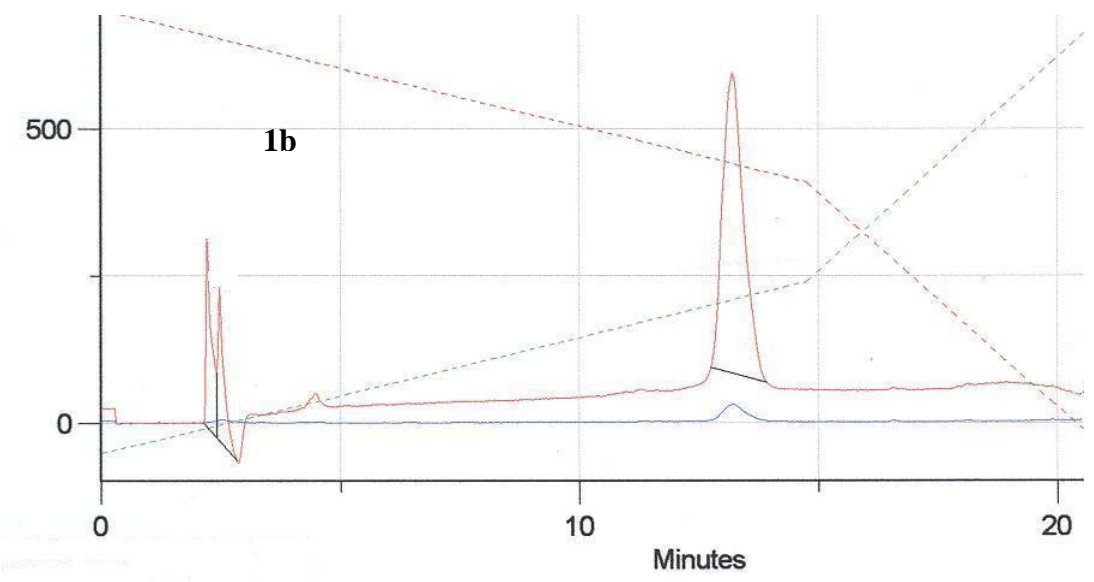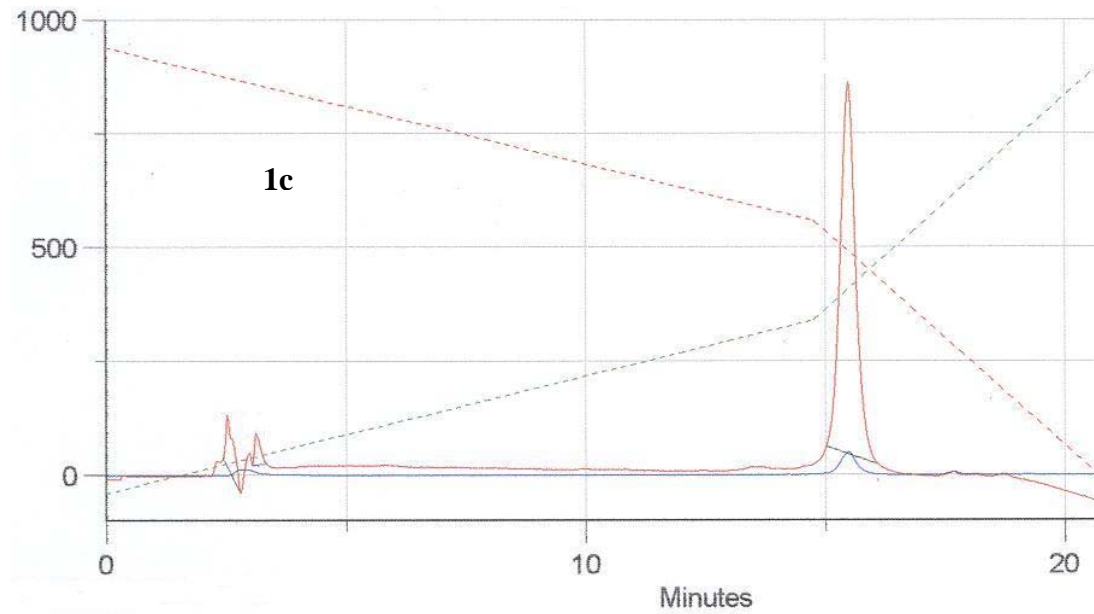

Supplement: NIHMS63712-supplement-1si20060913_07.pdf [file NIHMS63712-supplement-1si20060913_07.pdf]
